# Supplementary material for: Physical Mechanism of Spectra in Carbon Nanobelts under Quantum Size Effect
Source: MDPI journal article supplement (doi:10.3390/nano13010159), 2022-12-29
Supplement: s1 [file s1]

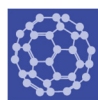

## Article

# Physical Mechanism of Spectra in Carbon Nanobelts under Quantum Size Effect

Ning Li <sup>1,†</sup>, Lei Zhang <sup>1,\*</sup>, Chen Lu <sup>1,†</sup>, Ying Sun <sup>2,\*</sup> and Jingang Wang <sup>1,\*</sup><sup>1</sup> College of Science, Liaoning Petrochemical University, Fushun 113001, China<sup>2</sup> Institute of Clean Energy Chemistry, Key Laboratory for Green Synthesis and Preparative Chemistry of Advanced Materials of Liaoning Province, College of Chemistry, Liaoning University, Shenyang 110036, China

\* Correspondence: zhanglei@lnpu.edu.cn (L.Z.); yingsun@lnu.edu.cn (Y.S.); jingang\_wang@lnpu.edu.cn (J.W.)

† These authors contributed equally to this work.

## Supplementary Materials

Table S1. Orbital contribution of S<sub>18</sub> of [4,4]CNB

| [4,4]CNB&S <sub>18</sub> |   |             |                      |        |
|--------------------------|---|-------------|----------------------|--------|
| occupied orbit           |   | empty orbit | Configuration factor | %      |
| HOMO-2                   | → | LUMO+1      | 0.60094              | 72.23% |
| HOMO-4                   | → | LUMO        | -0.25055             | 12.56% |
| HOMO                     | → | LUMO+6      | 0.14734              | 4.34%  |
| HOMO-3                   | → | LUMO+4      | 0.13203              | 3.49%  |
| HOMO-1                   | → | LUMO+5      | 0.09645              | 1.86%  |
| HOMO-3                   | → | LUMO        | 0.07123              | 1.01%  |
| HOMO-6                   | → | LUMO+6      | 0.06094              | 0.74%  |
| HOMO-2                   | → | LUMO+7      | 0.05115              | 0.52%  |
| HOMO-5                   | → | LUMO+1      | 0.04239              | 0.36%  |
| HOMO-4                   | → | LUMO+4      | 0.03961              | 0.31%  |

Table S2. Orbital contribution of S<sub>19</sub> of [4,4]CNB.

| [4,4]CNB&S <sub>19</sub> |   |             |                      |        |
|--------------------------|---|-------------|----------------------|--------|
| occupied orbit           |   | empty orbit | Configuration factor | %      |
| HOMO-3                   | → | LUMO+1      | 0.60095              | 72.23% |
| HOMO-5                   | → | LUMO        | -0.25053             | 12.55% |
| HOMO                     | → | LUMO+5      | 0.14729              | 4.34%  |
| HOMO-2                   | → | LUMO+4      | 0.13206              | 3.49%  |
| HOMO-1                   | → | LUMO+6      | 0.09649              | 1.86%  |
| HOMO-2                   | → | LUMO        | 0.07121              | 1.01%  |
| HOMO-6                   | → | LUMO+5      | 0.06095              | 0.74%  |
| HOMO-3                   | → | LUMO+7      | 0.05115              | 0.52%  |
| HOMO-4                   | → | LUMO+1      | 0.04236              | 0.36%  |
| HOMO-5                   | → | LUMO+4      | 0.03959              | 0.31%  |

Table S3. Orbital contribution of S<sub>13</sub> of [6,6]CNB

| [6,6]CNB&S <sub>13</sub> |   |             |                      |        |
|--------------------------|---|-------------|----------------------|--------|
| occupied orbit           |   | empty orbit | Configuration factor | %      |
| HOMO-1                   | → | LUMO+2      | 0.34023              | 23.15% |
| HOMO-2                   | → | LUMO+1      | 0.33771              | 22.81% |
| HOMO-5                   | → | LUMO        | -0.31329             | 19.63% |
| HOMO                     | → | LUMO+5      | -0.26725             | 14.28% |
| HOMO-7                   | → | LUMO        | -0.22025             | 9.70%  |
| HOMO-3                   | → | LUMO+4      | -0.11019             | 2.43%  |
| HOMO-2                   | → | LUMO+5      | 0.11012              | 2.43%  |
| HOMO-2                   | → | LUMO+7      | 0.0698               | 0.97%  |
| HOMO-3                   | → | LUMO+6      | -0.06978             | 0.97%  |
| HOMO-8                   | → | LUMO+5      | 0.06509              | 0.85%  |

Table S4. Orbital contribution of S<sub>14</sub> of [6,6]CNB

| [6,6]CNB&S <sub>14</sub> |   |             |                      |        |
|--------------------------|---|-------------|----------------------|--------|
| occupied orbit           |   | empty orbit | Configuration factor | %      |
| HOMO-1                   | → | LUMO+3      | 0.34058              | 23.20% |
| HOMO-3                   | → | LUMO+1      | -0.33801             | 22.85% |
| HOMO-4                   | → | LUMO        | 0.31276              | 19.56% |
| HOMO                     | → | LUMO+4      | 0.26723              | 14.28% |
| HOMO-6                   | → | LUMO        | -0.22022             | 9.70%  |
| HOMO-2                   | → | LUMO+4      | 0.10999              | 2.42%  |
| HOMO-3                   | → | LUMO+5      | 0.10988              | 2.41%  |
| HOMO-2                   | → | LUMO+6      | 0.06989              | 0.98%  |
| HOMO-3                   | → | LUMO+7      | 0.06983              | 0.98%  |
| HOMO-8                   | → | LUMO+4      | -0.06502             | 0.85%  |

Table S5. Orbital contribution of S<sub>13</sub> of [8,8]CNB

| [8,8]CNB&S <sub>13</sub> |   |             |                      |        |
|--------------------------|---|-------------|----------------------|--------|
| occupied orbit           |   | empty orbit | Configuration factor | %      |
| HOMO                     | → | LUMO+4      | 0.34952              | 24.43% |
| HOMO-1                   | → | LUMO+2      | -0.3411              | 23.27% |
| HOMO-3                   | → | LUMO+1      | 0.32875              | 21.62% |
| HOMO-5                   | → | LUMO        | -0.32033             | 20.52% |
| HOMO-4                   | → | LUMO+6      | 0.07057              | 1.00%  |
| HOMO-5                   | → | LUMO+7      | -0.07019             | 0.99%  |
| HOMO                     | → | LUMO+8      | -0.06939             | 0.96%  |
| HOMO-3                   | → | LUMO+7      | 0.06892              | 0.95%  |
| HOMO-2                   | → | LUMO+6      | 0.06891              | 0.95%  |
| HOMO-7                   | → | LUMO+2      | -0.06191             | 0.77%  |

Table S6. Orbital contribution of S<sub>14</sub> of [8,8]CNB

| [8,8]CNB&S <sub>14</sub> |   |             |                      |        |
|--------------------------|---|-------------|----------------------|--------|
| occupied orbit           |   | empty orbit | Configuration factor | %      |
| HOMO                     | → | LUMO+5      | 0.34952              | 24.43% |
| HOMO-                    | → | LUMO+3      | -0.3411              | 23.27% |
| HOMO-2                   | → | LUMO+1      | 0.32875              | 21.62% |
| HOMO-4                   | → | LUMO        | -0.32033             | 20.52% |
| HOMO-5                   | → | LUMO+6      | 0.07057              | 1.00%  |
| HOMO-4                   | → | LUMO+7      | 0.07019              | 0.99%  |
| HOMO                     | → | LUMO+9      | -0.06939             | 0.96%  |
| HOMO-2                   | → | LUMO+7      | -0.06892             | 0.95%  |
| HOMO-3                   | → | LUMO+6      | 0.06891              | 0.95%  |
| HOMO-7                   | → | LUMO+3      | 0.06191              | 0.77%  |

Table S7. Orbital contribution of S<sub>12</sub> of [10,10]CNB

| [10,10]CNB&S <sub>12</sub> |   |             |                      |        |
|----------------------------|---|-------------|----------------------|--------|
| occupied orbit             |   | empty orbit | Configuration factor | %      |
| HOMO-4                     | → | LUMO        | 0.35061              | 24.59% |
| HOMO-1                     | → | LUMO+4      | 0.34874              | 24.32% |
| HOMO                       | → | LUMO+3      | -0.28997             | 16.82% |
| HOMO-3                     | → | LUMO+1      | -0.27376             | 14.99% |
| HOMO-2                     | → | LUMO+1      | -0.10913             | 2.38%  |
| HOMO-2                     | → | LUMO+6      | -0.07959             | 1.27%  |
| HOMO-3                     | → | LUMO+7      | -0.07926             | 1.26%  |
| HOMO-6                     | → | LUMO+2      | -0.07148             | 1.02%  |
| HOMO-7                     | → | LUMO+3      | -0.07119             | 1.01%  |
| HOMO-1                     | → | LUMO+5      | 0.07071              | 1.00%  |

Table S8. Orbital contribution of S<sub>13</sub> of [10,10]CNB

| [10,10]CNB&S <sub>13</sub> |   |             |                      |        |
|----------------------------|---|-------------|----------------------|--------|
| occupied orbit             |   | empty orbit | Configuration factor | %      |
| HOMO-5                     | → | LUMO        | 0.35103              | 24.64% |
| HOMO-1                     | → | LUMO+5      | -0.3492              | 24.39% |
| HOMO                       | → | LUMO+2      | 0.28951              | 16.76% |
| HOMO-2                     | → | LUMO+1      | 0.27328              | 14.94% |
| HOMO-3                     | → | LUMO+1      | -0.10916             | 2.38%  |
| HOMO-3                     | → | LUMO+6      | 0.07913              | 1.25%  |
| HOMO-2                     | → | LUMO+7      | -0.07905             | 1.25%  |
| HOMO-6                     | → | LUMO+3      | 0.07104              | 1.01%  |
| HOMO-7                     | → | LUMO+2      | -0.071               | 1.01%  |
| HOMO-1                     | → | LUMO+4      | 0.07055              | 1.00%  |

Table S9. Orbital contribution of S<sub>12</sub> of [12,12]CNB

| [12,12]CNB&S <sub>12</sub> |   |             |                      |        |
|----------------------------|---|-------------|----------------------|--------|
| occupied orbit             |   | empty orbit | Configuration factor | %      |
| HOMO-5                     | → | LUMO        | 0.36741              | 27.00% |
| HOMO-1                     | → | LUMO+4      | -0.36474             | 26.61% |
| HOMO                       | → | LUMO+2      | -0.25591             | 13.10% |
| HOMO-3                     | → | LUMO+1      | -0.25455             | 12.96% |
| HOMO-4                     | → | LUMO+8      | -0.1093              | 2.39%  |
| HOMO-5                     | → | LUMO+9      | -0.10868             | 2.36%  |
| HOMO-10                    | → | LUMO+5      | 0.10862              | 2.36%  |
| HOMO-11                    | → | LUMO+4      | -0.108               | 2.33%  |
| HOMO-3                     | → | LUMO+6      | -0.09407             | 1.77%  |
| HOMO-2                     | → | LUMO+7      | 0.09352              | 1.75%  |

Table S10. Orbital contribution of S<sub>13</sub> of [12,12]CNB

| [12,12]CNB&S <sub>13</sub> |   |             |                      |        |
|----------------------------|---|-------------|----------------------|--------|
| occupied orbit             |   | empty orbit | Configuration factor | %      |
| HOMO-4                     | → | LUMO        | 0.36741              | 27.00% |
| HOMO-1                     | → | LUMO+5      | -0.36474             | 26.61% |
| HOMO                       | → | LUMO+3      | -0.25591             | 13.10% |
| HOMO-2                     | → | LUMO+1      | 0.25455              | 12.96% |
| HOMO-5                     | → | LUMO+8      | -0.1093              | 2.39%  |
| HOMO-4                     | → | LUMO+9      | 0.10868              | 2.36%  |
| HOMO-10                    | → | LUMO+4      | 0.10862              | 2.36%  |
| HOMO-11                    | → | LUMO+5      | 0.108                | 2.33%  |
| HOMO-2                     | → | LUMO+6      | -0.09407             | 1.77%  |
| HOMO-3                     | → | LUMO+7      | -0.09352             | 1.75%  |

Table S11. Orbital contribution of S<sub>12</sub> of [14,14]CNB

| [14,14]CNB&S <sub>12</sub> |   |             |                      |        |
|----------------------------|---|-------------|----------------------|--------|
| occupied orbit             |   | empty orbit | Configuration factor | %      |
| HOMO-1                     | → | LUMO+4      | 0.34196              | 23.39% |
| HOMO-4                     | → | LUMO        | -0.3159              | 19.96% |
| HOMO                       | → | LUMO+3      | 0.21728              | 9.44%  |
| HOMO-5                     | → | LUMO        | -0.19573             | 7.66%  |
| HOMO-3                     | → | LUMO+1      | 0.1928               | 7.43%  |
| HOMO-1                     | → | LUMO+5      | -0.13817             | 3.82%  |
| HOMO-10                    | → | LUMO+5      | -0.12602             | 3.18%  |
| HOMO-11                    | → | LUMO+4      | -0.12599             | 3.17%  |
| HOMO-5                     | → | LUMO+8      | 0.10291              | 2.12%  |
| HOMO-4                     | → | LUMO+9      | -0.10289             | 2.12%  |

Table S12. Orbital contribution of S<sub>13</sub> of [14,14]CNB

| [14,14]CNB&S <sub>13</sub> |   |             |                      |        |
|----------------------------|---|-------------|----------------------|--------|
| occupied orbit             |   | empty orbit | Configuration factor | %      |
| HOMO-1                     | → | LUMO+5      | 0.34197              | 23.39% |
| HOMO-5                     | → | LUMO        | -0.31591             | 19.96% |
| HOMO                       | → | LUMO+2      | -0.21727             | 9.44%  |
| HOMO-4                     | → | LUMO        | 0.19573              | 7.66%  |
| HOMO-2                     | → | LUMO+1      | -0.19279             | 7.43%  |
| HOMO-1                     | → | LUMO+4      | 0.13817              | 3.82%  |
| HOMO-10                    | → | LUMO+4      | -0.12603             | 3.18%  |
| HOMO-11                    | → | LUMO+5      | 0.12599              | 3.17%  |
| HOMO-4                     | → | LUMO+8      | 0.10293              | 2.12%  |
| HOMO-5                     | → | LUMO+9      | 0.10289              | 2.12%  |

Table S13. Orbital contribution of S<sub>12</sub> of [16,16]CNB

| [16,16]CNB&S <sub>12</sub> |   |             |                      |        |
|----------------------------|---|-------------|----------------------|--------|
| occupied orbit             |   | empty orbit | Configuration factor | %      |
| HOMO-8                     | → | LUMO        | 0.27239              | 14.84% |
| HOMO-6                     | → | LUMO+4      | 0.20413              | 8.33%  |
| HOMO-7                     | → | LUMO+5      | -0.20412             | 8.33%  |
| HOMO-3                     | → | LUMO+10     | -0.19954             | 7.96%  |
| HOMO-2                     | → | LUMO+9      | 0.14906              | 4.44%  |
| HOMO-1                     | → | LUMO+8      | 0.14906              | 4.44%  |
| HOMO-5                     | → | LUMO+6      | 0.12373              | 3.06%  |
| HOMO-4                     | → | LUMO+7      | 0.12371              | 3.06%  |
| HOMO-13                    | → | LUMO+5      | 0.10307              | 2.12%  |
| HOMO-12                    | → | LUMO+4      | -0.10307             | 2.12%  |

Table S14. Orbital contribution of S<sub>13</sub> of [16,16]CNB

| [16,16]CNB&S <sub>13</sub> |   |             |                      |        |
|----------------------------|---|-------------|----------------------|--------|
| occupied orbit             |   | empty orbit | Configuration factor | %      |
| HOMO-9                     | → | LUMO        | 0.27239              | 14.84% |
| HOMO-6                     | → | LUMO+5      | 0.20413              | 8.33%  |
| HOMO-7                     | → | LUMO+4      | 0.20412              | 8.33%  |
| HOMO-3                     | → | LUMO+11     | -0.19954             | 7.96%  |
| HOMO-1                     | → | LUMO+9      | -0.14906             | 4.44%  |
| HOMO-2                     | → | LUMO+8      | 0.14906              | 4.44%  |
| HOMO-4                     | → | LUMO+6      | -0.12373             | 3.06%  |
| HOMO-5                     | → | LUMO+7      | 0.12371              | 3.06%  |
| HOMO-13                    | → | LUMO+4      | 0.10307              | 2.12%  |
| HOMO-12                    | → | LUMO+5      | 0.10307              | 2.12%  |

**[6,6]CNB**

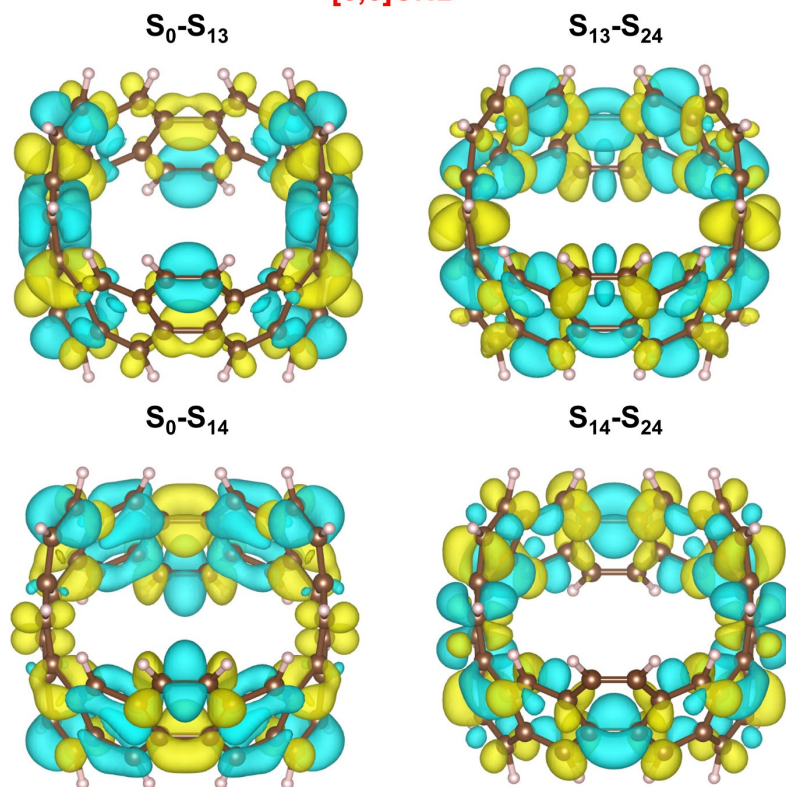

Figure S1. CDD of  $S_0 \rightarrow S_{13} \rightarrow S_{24}$  and  $S_0 \rightarrow S_{14} \rightarrow S_{24}$  in the TPA of [6,6]CNB.

**[8,8]CNB**

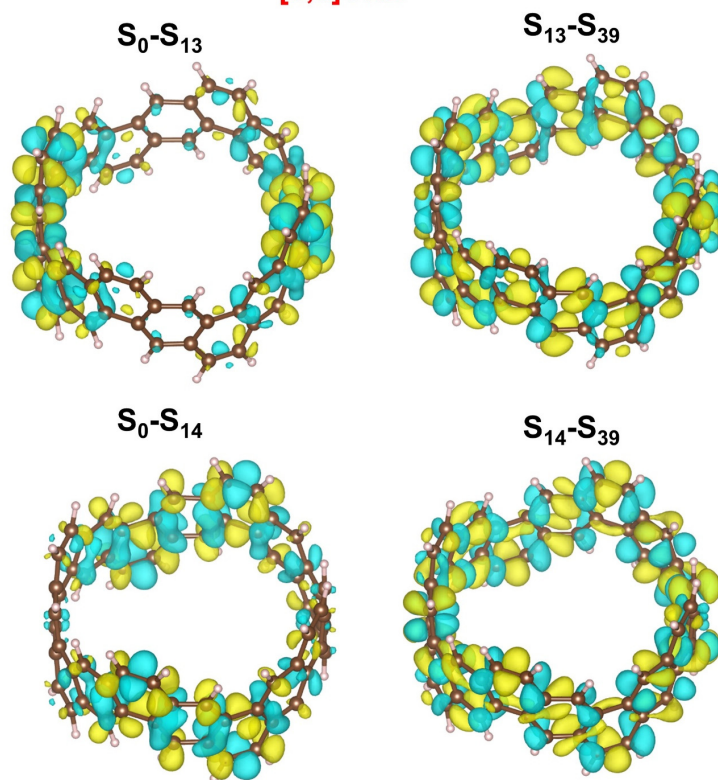

Figure S2. CDD of  $S_0 \rightarrow S_{13} \rightarrow S_{39}$  and  $S_0 \rightarrow S_{14} \rightarrow S_{39}$  in the TPA of [8,8]CNB.

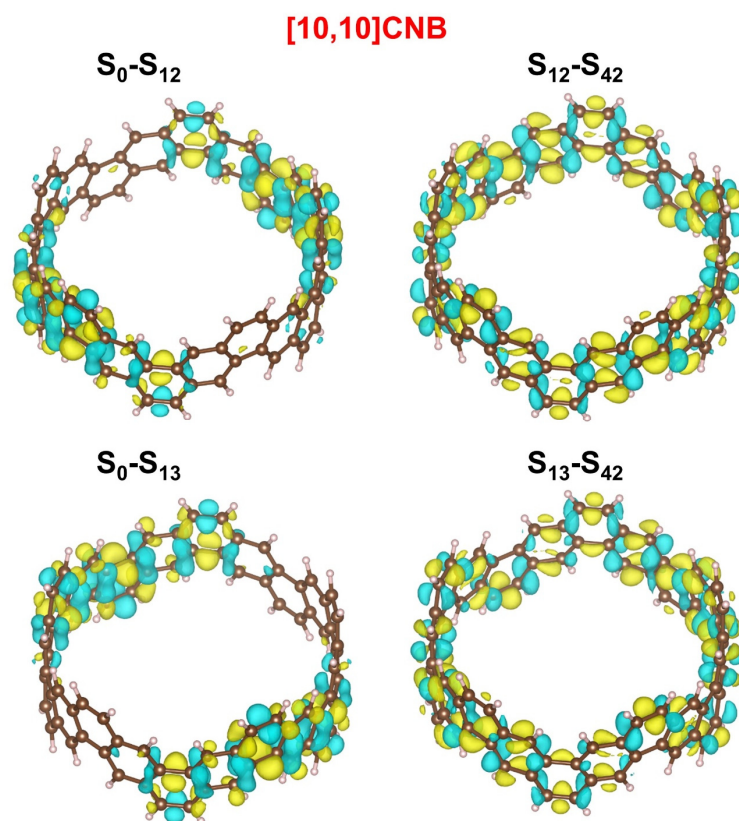

Figure S3. CDD of S<sub>0</sub>→S<sub>12</sub>→S<sub>42</sub> and S<sub>0</sub>→S<sub>13</sub>→S<sub>42</sub> in the TPA of [10,10]CNB.

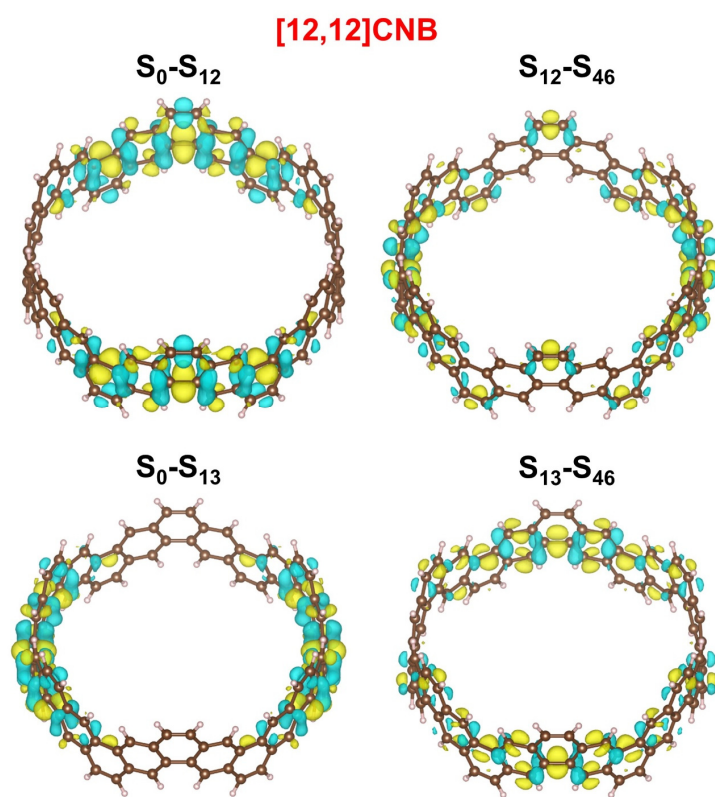

Figure S4. CDD of S<sub>0</sub>→S<sub>12</sub>→S<sub>46</sub> and S<sub>0</sub>→S<sub>13</sub>→S<sub>46</sub> in the TPA of [12,12]CNB.



**[14,14]CNB**

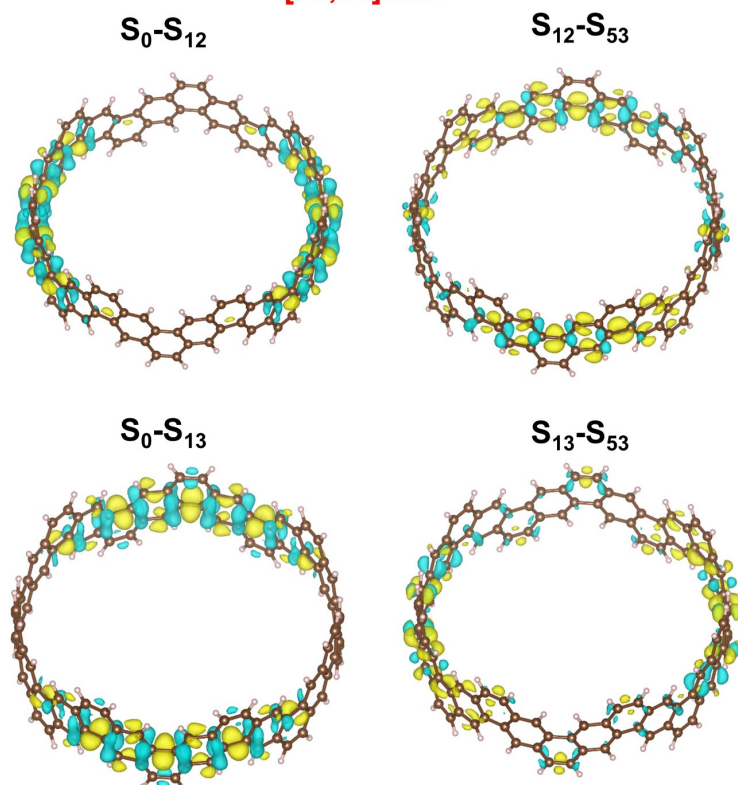

Figure S5. CDD of  $S_0 \rightarrow S_{12} \rightarrow S_{53}$  and  $S_0 \rightarrow S_{13} \rightarrow S_{53}$  in the TPA of [14,14]CNB.

**[16,16]CNB**

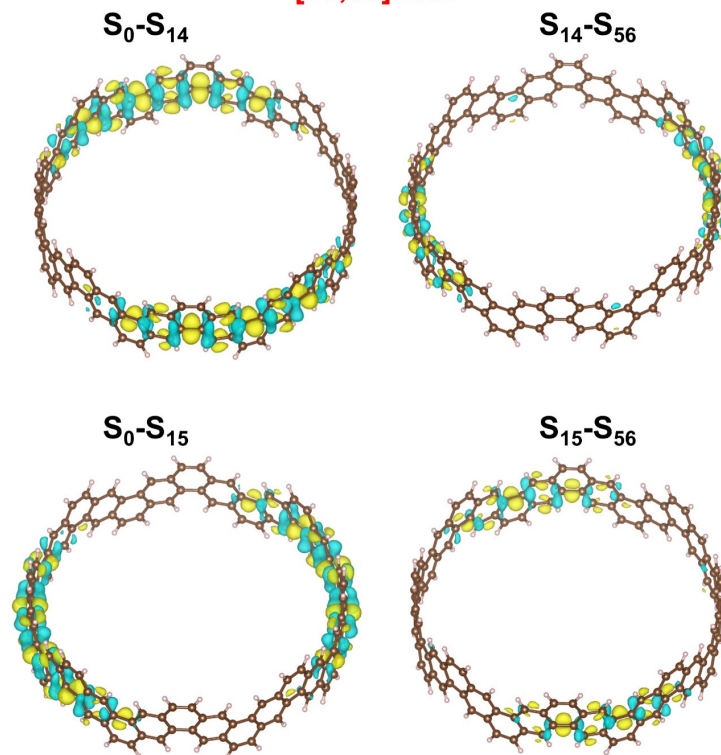

Figure S6. CDD of  $S_0 \rightarrow S_{14} \rightarrow S_{56}$  and  $S_0 \rightarrow S_{15} \rightarrow S_{56}$  in the TPA of [16,16]CNB.



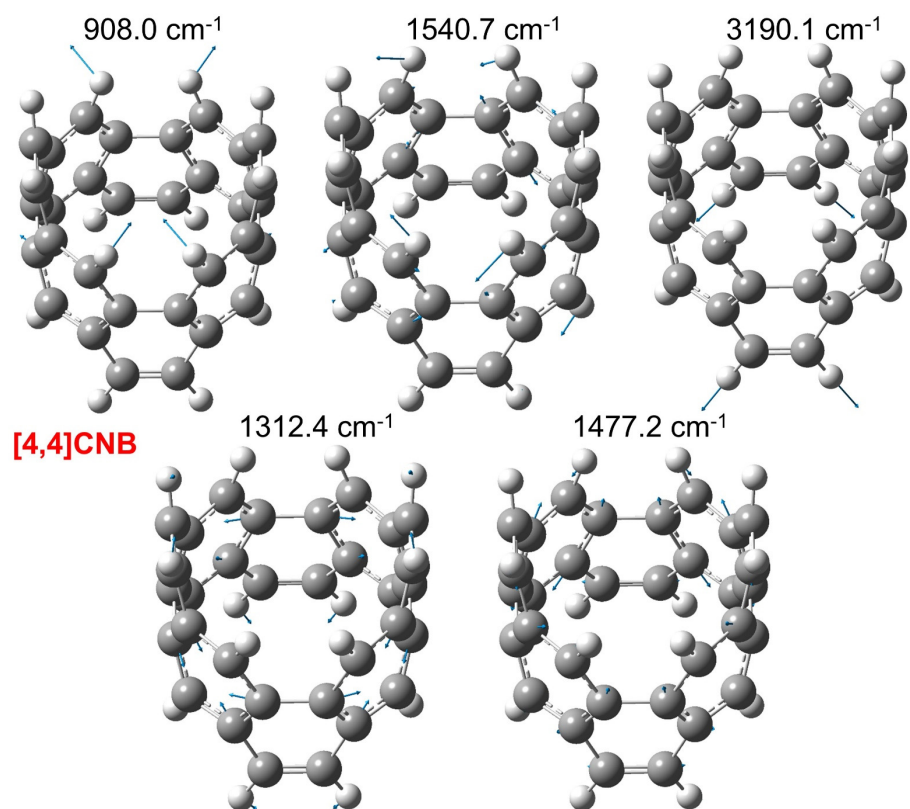

Figure S7. Vibrational modes of [4,4]C<sub>6</sub>N<sub>2</sub>B<sub>4</sub> at 908.0, 1312.4, 1477.2, 1540.7 and 3190.1 cm<sup>-1</sup>

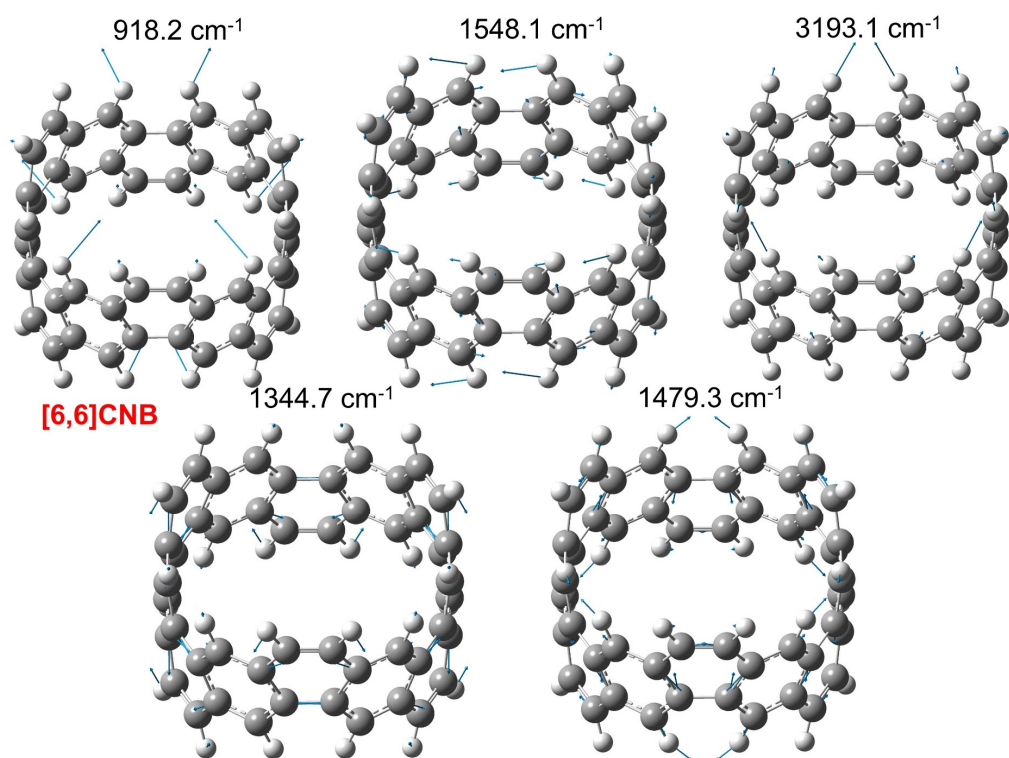

Figure S8. Vibrational modes of [6,6]C<sub>6</sub>N<sub>2</sub>B<sub>4</sub> at 918.2, 1344.7, 1479.3, 1548.1 and 3193.1 cm<sup>-1</sup>

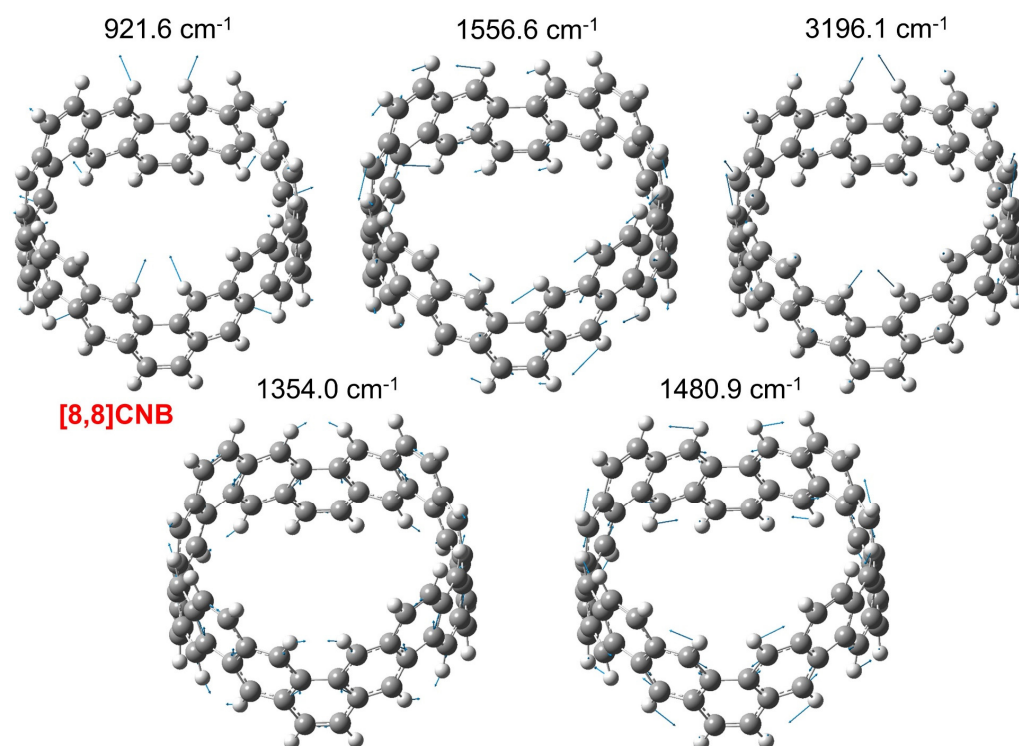

Figure S9. Vibrational modes of [8,8]C<sub>60</sub> at 921.6, 1354.0, 1480.9, 1556.6 and 3196.1 cm<sup>-1</sup>

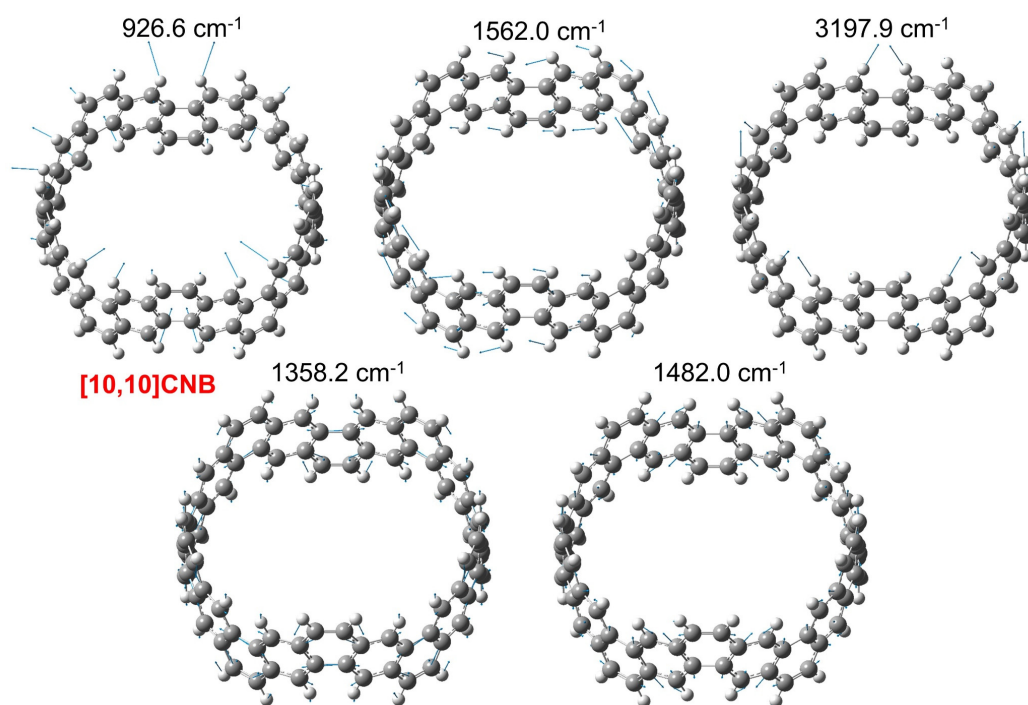

Figure S10. Vibrational modes of [10,10]C<sub>60</sub> at 926.6, 1358.2, 1482.0, 1562.0 and 3197.9 cm<sup>-1</sup>

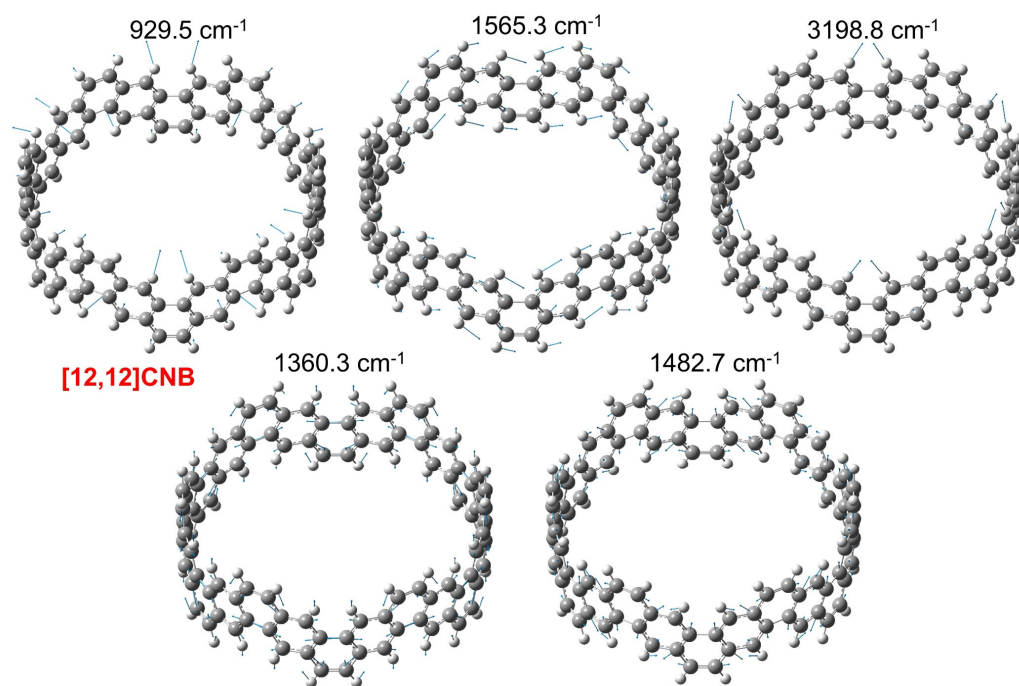

Figure S11. Vibrational modes of [12,12]C<sub>60</sub> at 929.5, 1360.3, 1482.7, 1565.3 and 3198.8  $\text{cm}^{-1}$

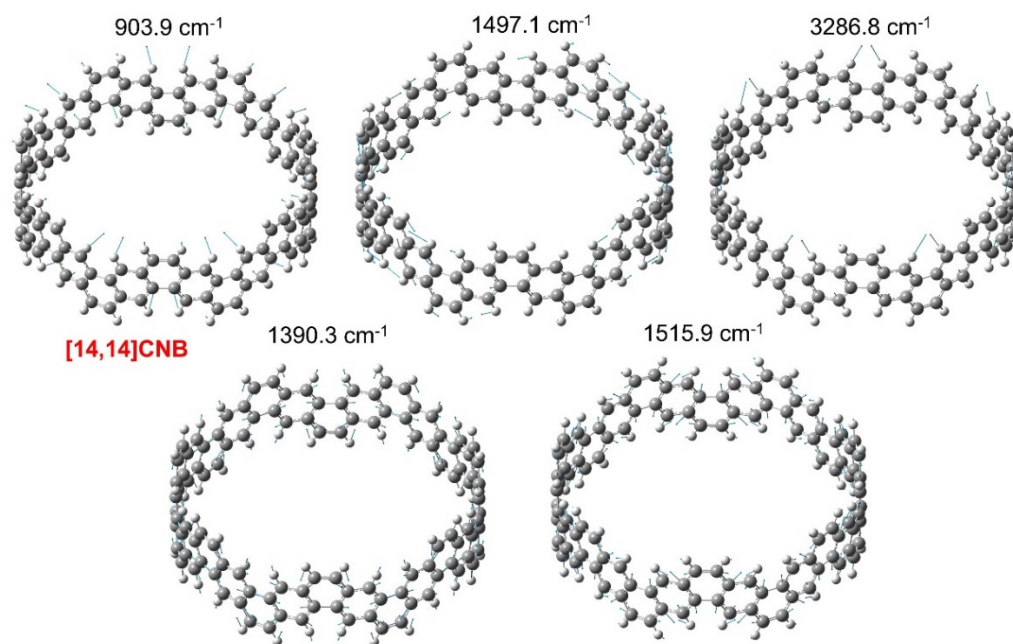

Figure S12. Vibrational modes of [14,14]C<sub>60</sub> at 903.9, 1390.3, 1497.1, 1515.9 and 3286.6  $\text{cm}^{-1}$

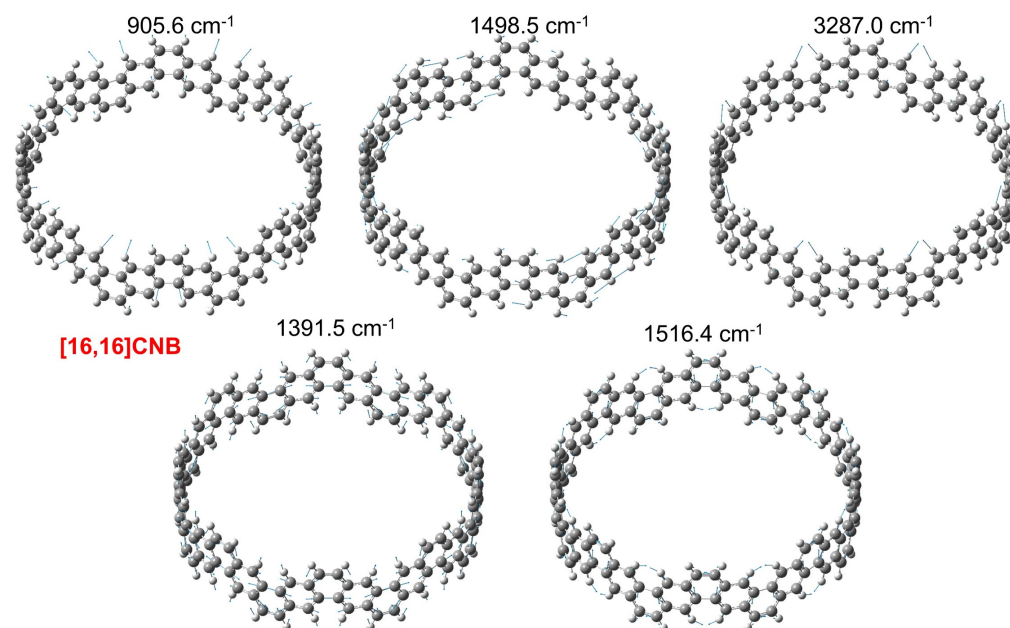

Figure S13. Vibrational modes of [16,16]C60 at 905.6, 1391.5, 1498.5, 1516.4 and 3287.0  $\text{cm}^{-1}$

#### Coordinates of [2N,2N]C60

##### [4,4]C60

|   |             |             |             |
|---|-------------|-------------|-------------|
| C | -2.75450600 | 0.65843300  | -2.42624800 |
| C | -2.74474300 | -0.69736300 | -2.42638400 |
| C | 2.75452200  | -0.65842800 | -2.42624100 |
| C | 2.74475700  | 0.69736700  | -2.42637600 |
| C | 1.44641300  | 2.41818500  | -1.21838900 |
| C | 0.72085600  | 2.72527300  | -0.05234100 |
| C | -0.75987200 | 2.71491200  | -0.05217100 |
| C | 2.71496800  | 0.75988300  | 0.05218900  |
| C | 1.35999700  | 2.42829400  | 1.19253700  |
| C | 0.65843200  | 2.75441400  | 2.42624600  |
| C | -1.39437600 | 2.40847900  | 1.19277700  |
| C | -0.69737300 | 2.74464700  | 2.42638000  |
| C | -2.41825000 | 1.44641900  | 1.21838200  |
| C | 0.69736600  | -2.74465900 | 2.42637700  |
| C | 2.39782500  | 1.48127800  | 1.21810800  |
| C | 2.41824300  | -1.44642100 | 1.21838600  |
| C | -1.48127100 | 2.39777200  | -1.21811200 |
| C | -2.40849700 | -1.39436300 | -1.19278200 |
| C | -2.42830400 | 1.35999100  | -1.19253900 |
| C | -2.72532900 | 0.72086800  | 0.05235200  |
| C | -1.44641400 | -2.41818900 | -1.21839500 |
| C | -0.72085900 | -2.72527200 | -0.05234900 |
| C | -2.71496800 | -0.75988100 | 0.05217800  |
| C | 1.48127100  | -2.39776400 | -1.21811400 |
| C | 0.75987100  | -2.71491300 | -0.05217400 |
| C | 2.40849400  | 1.39436400  | -1.19277500 |
| C | 2.42830700  | -1.35998700 | -1.19253400 |
| C | 2.72532900  | -0.72086900 | 0.05235900  |
| C | -2.39782600 | -1.48127700 | 1.21810100  |
| C | -1.36000000 | -2.42828900 | 1.19253100  |
| C | -0.65843800 | -2.75442100 | 2.42624000  |
| C | 1.39437200  | -2.40848500 | 1.19277500  |

|   |             |             |             |
|---|-------------|-------------|-------------|
| H | -2.84177700 | 1.22365300  | -3.35794700 |
| H | -2.82385700 | -1.26359900 | -3.35819300 |
| H | 2.84181300  | -1.22364800 | -3.35793800 |
| H | 2.82388900  | 1.26360600  | -3.35818200 |
| H | 1.06805600  | 2.72116300  | -2.19685800 |
| H | -1.10766900 | 2.70660000  | -2.19659100 |
| H | -1.06805500 | -2.72116200 | -2.19686500 |
| H | 1.10766900  | -2.70658700 | -2.19659400 |
| H | 1.22363600  | 2.84159000  | 3.35796300  |
| H | -1.26359500 | 2.82366300  | 3.35820600  |
| H | -2.70664000 | -1.10767500 | 2.19658500  |
| H | -2.72121500 | 1.06806200  | 2.19685500  |
| H | -1.22364500 | -2.84160500 | 3.35795500  |
| H | 1.26358800  | -2.82368700 | 3.35820200  |
| H | 2.70663100  | 1.10767400  | 2.19659300  |
| H | 2.72120000  | -1.06806400 | 2.19686100  |

[6,6]CNB

|   |             |             |             |
|---|-------------|-------------|-------------|
| C | 2.68540000  | 3.17180000  | 1.19330000  |
| C | 3.18790000  | 2.68870000  | -0.05710000 |
| C | 2.63710000  | 3.24480000  | -1.22080000 |
| C | 1.40410000  | 3.91150000  | -1.19330000 |
| C | 0.73450000  | 4.10510000  | 0.05710000  |
| C | 1.49160000  | 3.90620000  | 1.22080000  |
| C | -0.73450000 | 4.10510000  | 0.05710000  |
| C | -1.40410000 | 3.91150000  | -1.19330000 |
| C | -0.67790000 | 4.15170000  | -2.42200000 |
| C | 0.67790000  | 4.15170000  | -2.42200000 |
| C | -1.49160000 | 3.90620000  | 1.22080000  |
| C | -2.68540000 | 3.17180000  | 1.19330000  |
| C | -3.18790000 | 2.68870000  | -0.05710000 |
| C | -2.63710000 | 3.24480000  | -1.22080000 |
| C | -3.25650000 | 2.66300000  | 2.42200000  |
| C | -3.93450000 | 1.48870000  | 2.42200000  |
| C | -4.08950000 | 0.73980000  | 1.19330000  |
| C | -3.92240000 | 1.41640000  | -0.05710000 |
| C | -4.12860000 | -0.66140000 | 1.22080000  |
| C | -3.92240000 | -1.41640000 | 0.05710000  |
| C | -4.08950000 | -0.73980000 | -1.19330000 |
| C | -4.12860000 | 0.66140000  | -1.22080000 |
| C | -3.18790000 | -2.68870000 | 0.05710000  |
| C | -2.68540000 | -3.17180000 | -1.19330000 |
| C | -3.25650000 | -2.66300000 | -2.42200000 |
| C | -3.93450000 | -1.48870000 | -2.42200000 |
| C | -2.63710000 | -3.24480000 | 1.22080000  |
| C | -1.40410000 | -3.91150000 | 1.19330000  |
| C | -0.73450000 | -4.10510000 | -0.05710000 |
| C | -1.49160000 | -3.90620000 | -1.22080000 |
| C | -0.67790000 | -4.15170000 | 2.42200000  |
| C | 0.67790000  | -4.15170000 | 2.42200000  |
| C | 1.40410000  | -3.91150000 | 1.19330000  |
| C | 0.73450000  | -4.10510000 | -0.05710000 |
| C | 2.63710000  | -3.24480000 | 1.22080000  |
| C | 3.18790000  | -2.68870000 | 0.05710000  |

|   |             |             |             |
|---|-------------|-------------|-------------|
| C | 2.68540000  | -3.17180000 | -1.19330000 |
| C | 1.49160000  | -3.90620000 | -1.22080000 |
| C | 3.92240000  | -1.41640000 | 0.05710000  |
| C | 4.08950000  | -0.73980000 | -1.19330000 |
| C | 3.93450000  | -1.48870000 | -2.42200000 |
| C | 3.25650000  | -2.66300000 | -2.42200000 |
| C | 4.12860000  | -0.66140000 | 1.22080000  |
| C | 4.08950000  | 0.73980000  | 1.19330000  |
| C | 3.92240000  | 1.41640000  | -0.05710000 |
| C | 4.12860000  | 0.66140000  | -1.22080000 |
| C | 3.93450000  | 1.48870000  | 2.42200000  |
| C | 3.25650000  | 2.66300000  | 2.42200000  |
| H | 4.26100000  | 1.03420000  | 3.35420000  |
| H | 1.23480000  | -4.20720000 | 3.35420000  |
| H | -1.23480000 | -4.20720000 | 3.35420000  |
| H | -3.02610000 | 3.17300000  | 3.35420000  |
| H | -4.26100000 | -1.03420000 | -3.35420000 |
| H | -3.02610000 | -3.17300000 | -3.35420000 |
| H | 1.23480000  | 4.20720000  | -3.35420000 |
| H | 3.02610000  | -3.17300000 | -3.35420000 |
| H | 4.26100000  | -1.03420000 | -3.35420000 |
| H | -1.23480000 | 4.20720000  | -3.35420000 |
| H | -4.26100000 | 1.03420000  | 3.35420000  |
| H | 3.02610000  | 3.17300000  | 3.35420000  |
| H | -1.06310000 | -4.12610000 | -2.19450000 |
| H | -3.04180000 | -2.98380000 | 2.19450000  |
| H | 1.06310000  | -4.12610000 | -2.19450000 |
| H | 3.04180000  | -2.98380000 | 2.19450000  |
| H | 4.10490000  | -1.14240000 | 2.19450000  |
| H | 4.10490000  | 1.14240000  | -2.19450000 |
| H | 3.04180000  | 2.98380000  | -2.19450000 |
| H | 1.06310000  | 4.12610000  | 2.19450000  |
| H | -1.06310000 | 4.12610000  | 2.19450000  |
| H | -3.04180000 | 2.98380000  | -2.19450000 |
| H | -4.10490000 | 1.14240000  | -2.19450000 |
| H | -4.10490000 | -1.14240000 | 2.19450000  |

[8,8]CNB

|   |             |            |             |
|---|-------------|------------|-------------|
| C | -4.36210000 | 3.42580000 | -1.22050000 |
| C | -4.78950000 | 2.77630000 | -0.05570000 |
| C | -4.39550000 | 3.35070000 | 1.19590000  |
| C | -3.42580000 | 4.36210000 | 1.22050000  |
| C | -2.77630000 | 4.78950000 | 0.05570000  |
| C | -3.35070000 | 4.39550000 | -1.19590000 |
| C | -2.74220000 | 4.84950000 | -2.42430000 |
| C | -1.48990000 | 5.37070000 | -2.42440000 |
| C | -0.73870000 | 5.48170000 | -1.19600000 |
| C | -1.42330000 | 5.35260000 | 0.05560000  |
| C | 0.66210000  | 5.51160000 | -1.22040000 |
| C | 1.42330000  | 5.35260000 | -0.05560000 |
| C | 0.73870000  | 5.48170000 | 1.19600000  |
| C | -0.66210000 | 5.51160000 | 1.22040000  |
| C | 2.77630000  | 4.78950000 | -0.05570000 |
| C | 3.35070000  | 4.39550000 | 1.19590000  |



|   |             |             |             |
|---|-------------|-------------|-------------|
| C | 2.74220000  | 4.84950000  | 2.42430000  |
| C | 1.48990000  | 5.37070000  | 2.42440000  |
| C | 3.42580000  | 4.36210000  | -1.22050000 |
| C | 4.39550000  | 3.35070000  | -1.19590000 |
| C | 4.78950000  | 2.77630000  | 0.05570000  |
| C | 4.36210000  | 3.42580000  | 1.22050000  |
| C | 4.84950000  | 2.74220000  | -2.42430000 |
| C | 5.37070000  | 1.48990000  | -2.42440000 |
| C | 5.48170000  | 0.73870000  | -1.19600000 |
| C | 5.35260000  | 1.42330000  | 0.05560000  |
| C | 5.51160000  | -0.66210000 | -1.22040000 |
| C | 5.35260000  | -1.42330000 | -0.05560000 |
| C | 5.48170000  | -0.73870000 | 1.19600000  |
| C | 5.51160000  | 0.66210000  | 1.22040000  |
| C | 4.78950000  | -2.77630000 | -0.05570000 |
| C | 4.39550000  | -3.35070000 | 1.19590000  |
| C | 4.84950000  | -2.74220000 | 2.42430000  |
| C | 5.37070000  | -1.48990000 | 2.42440000  |
| C | 4.36210000  | -3.42580000 | -1.22050000 |
| C | 3.35070000  | -4.39550000 | -1.19590000 |
| C | 2.77630000  | -4.78950000 | 0.05570000  |
| C | 3.42580000  | -4.36210000 | 1.22050000  |
| C | 2.74220000  | -4.84950000 | -2.42430000 |
| C | 1.48990000  | -5.37070000 | -2.42440000 |
| C | 0.73870000  | -5.48170000 | -1.19600000 |
| C | 1.42330000  | -5.35260000 | 0.05560000  |
| C | -0.66210000 | -5.51160000 | -1.22040000 |
| C | -1.42330000 | -5.35260000 | -0.05560000 |
| C | -0.73870000 | -5.48170000 | 1.19600000  |
| C | 0.66210000  | -5.51160000 | 1.22040000  |
| C | -2.77630000 | -4.78950000 | -0.05570000 |
| C | -3.35070000 | -4.39550000 | 1.19590000  |
| C | -2.74220000 | -4.84950000 | 2.42430000  |
| C | -1.48990000 | -5.37070000 | 2.42440000  |
| C | -3.42580000 | -4.36210000 | -1.22050000 |
| C | -4.39550000 | -3.35070000 | -1.19590000 |
| C | -4.78950000 | -2.77630000 | 0.05570000  |
| C | -4.36210000 | -3.42580000 | 1.22050000  |
| C | -4.84950000 | -2.74220000 | -2.42430000 |
| C | -5.37070000 | -1.48990000 | -2.42440000 |
| C | -5.48170000 | -0.73870000 | -1.19600000 |
| C | -5.35260000 | -1.42330000 | 0.05560000  |
| C | -5.51160000 | 0.66210000  | -1.22040000 |
| C | -5.35260000 | 1.42330000  | -0.05560000 |
| C | -5.48170000 | 0.73870000  | 1.19600000  |
| C | -5.51160000 | -0.66210000 | 1.22040000  |
| C | -5.37070000 | 1.48990000  | 2.42440000  |
| C | -4.84950000 | 2.74220000  | 2.42430000  |
| H | 0.99400000  | 5.62200000  | 3.35890000  |
| H | 3.27010000  | 4.67490000  | 3.35880000  |
| H | 5.62200000  | -0.99400000 | 3.35890000  |
| H | 4.67490000  | -3.27010000 | 3.35880000  |
| H | -0.99400000 | -5.62200000 | 3.35890000  |
| H | -3.27010000 | -4.67490000 | 3.35880000  |
| H | 1.14470000  | -5.49600000 | 2.19320000  |



|   |             |             |             |
|---|-------------|-------------|-------------|
| H | -1.14470000 | -5.49600000 | -2.19320000 |
| H | -3.07350000 | -4.69200000 | -2.19340000 |
| H | -4.69200000 | -3.07350000 | 2.19340000  |
| H | 3.07350000  | -4.69200000 | 2.19340000  |
| H | 4.69200000  | -3.07350000 | -2.19340000 |
| H | -5.62200000 | 0.99400000  | 3.35890000  |
| H | -4.67490000 | 3.27010000  | 3.35880000  |
| H | 5.62200000  | 0.99400000  | -3.35890000 |
| H | 4.67490000  | 3.27010000  | -3.35880000 |
| H | -0.99400000 | 5.62200000  | -3.35890000 |
| H | -3.27010000 | 4.67490000  | -3.35880000 |
| H | -5.62200000 | -0.99400000 | -3.35890000 |
| H | -4.67490000 | -3.27010000 | -3.35880000 |
| H | 0.99400000  | -5.62200000 | -3.35890000 |
| H | 3.27010000  | -4.67490000 | -3.35880000 |
| H | 5.49600000  | 1.14470000  | 2.19320000  |
| H | 5.49600000  | -1.14470000 | -2.19320000 |
| H | 4.69200000  | 3.07350000  | 2.19340000  |
| H | 3.07350000  | 4.69200000  | -2.19340000 |
| H | -1.14470000 | 5.49600000  | 2.19320000  |
| H | 1.14470000  | 5.49600000  | -2.19320000 |
| H | -3.07350000 | 4.69200000  | 2.19340000  |
| H | -4.69200000 | 3.07350000  | -2.19340000 |
| H | -5.49600000 | -1.14470000 | 2.19320000  |
| H | -5.49600000 | 1.14470000  | -2.19320000 |

[10,10]CNB

|   |             |             |             |
|---|-------------|-------------|-------------|
| C | 0.09830000  | 6.93730000  | 2.42590000  |
| C | 1.44670000  | 6.78790000  | 2.42590000  |
| C | 2.16670000  | 6.55720000  | 1.19730000  |
| C | 1.49640000  | 6.74640000  | -0.05450000 |
| C | 0.04060000  | 6.90730000  | -0.05460000 |
| C | -0.65470000 | 6.86970000  | 1.19730000  |
| C | -2.03160000 | 6.61060000  | 1.22010000  |
| C | -2.75460000 | 6.33210000  | 0.05470000  |
| C | -2.10090000 | 6.57170000  | -1.19720000 |
| C | -0.73370000 | 6.87740000  | -1.22010000 |
| C | -4.02860000 | 5.60930000  | 0.05470000  |
| C | -4.56980000 | 5.17110000  | -1.19720000 |
| C | -3.99980000 | 5.66790000  | -2.42570000 |
| C | -2.81950000 | 6.33700000  | -2.42580000 |
| C | -4.63820000 | 5.13110000  | 1.22020000  |
| C | -5.56560000 | 4.08100000  | 1.19740000  |
| C | -5.95360000 | 3.50290000  | -0.05450000 |
| C | -5.53260000 | 4.15340000  | -1.22000000 |
| C | -6.00940000 | 3.46880000  | 2.42600000  |
| C | -6.57100000 | 2.23370000  | 2.42590000  |
| C | -6.73990000 | 1.49690000  | 1.19730000  |
| C | -6.55930000 | 2.16950000  | -0.05460000 |
| C | -6.92080000 | 0.10760000  | 1.22000000  |
| C | -6.87900000 | -0.66620000 | 0.05460000  |
| C | -6.90410000 | 0.02950000  | -1.19730000 |
| C | -6.77110000 | 1.42420000  | -1.22010000 |
| C | -6.58580000 | -2.10140000 | 0.05470000  |

|   |             |             |             |
|---|-------------|-------------|-------------|
| C | -6.33650000 | -2.75170000 | -1.19710000 |
| C | -6.63190000 | -2.05590000 | -2.42580000 |
| C | -6.90280000 | -0.72650000 | -2.42590000 |
| C | -6.32020000 | -2.82910000 | 1.22030000  |
| C | -5.60820000 | -4.03580000 | 1.19770000  |
| C | -5.17800000 | -4.58340000 | -0.05410000 |
| C | -5.66660000 | -3.98210000 | -1.21970000 |
| C | -5.16290000 | -4.64690000 | 2.42630000  |
| C | -4.16110000 | -5.56180000 | 2.42620000  |
| C | -3.51180000 | -5.94960000 | 1.19760000  |
| C | -4.09640000 | -5.57090000 | -0.05420000 |
| C | -2.24540000 | -6.54880000 | 1.22020000  |
| C | -1.49640000 | -6.74640000 | 0.05450000  |
| C | -2.16670000 | -6.55720000 | -1.19730000 |
| C | -3.45300000 | -6.00220000 | -1.21980000 |
| C | -0.04060000 | -6.90730000 | 0.05460000  |
| C | 0.65470000  | -6.86970000 | -1.19730000 |
| C | -0.09830000 | -6.93730000 | -2.42590000 |
| C | -1.44670000 | -6.78790000 | -2.42590000 |
| C | 0.73370000  | -6.87740000 | 1.22010000  |
| C | 2.10090000  | -6.57170000 | 1.19720000  |
| C | 2.75460000  | -6.33210000 | -0.05470000 |
| C | 2.03160000  | -6.61060000 | -1.22010000 |
| C | 2.81950000  | -6.33700000 | 2.42580000  |
| C | 3.99980000  | -5.66790000 | 2.42570000  |
| C | 4.56980000  | -5.17110000 | 1.19720000  |
| C | 4.02860000  | -5.60930000 | -0.05470000 |
| C | 5.53260000  | -4.15340000 | 1.22000000  |
| C | 5.95360000  | -3.50290000 | 0.05450000  |
| C | 5.56560000  | -4.08100000 | -1.19740000 |
| C | 4.63820000  | -5.13110000 | -1.22020000 |
| C | 6.55930000  | -2.16950000 | 0.05460000  |
| C | 6.73990000  | -1.49690000 | -1.19730000 |
| C | 6.57100000  | -2.23370000 | -2.42590000 |
| C | 6.00940000  | -3.46880000 | -2.42600000 |
| C | 6.77110000  | -1.42420000 | 1.22010000  |
| C | 6.90410000  | -0.02950000 | 1.19730000  |
| C | 6.87900000  | 0.66620000  | -0.05460000 |
| C | 6.92080000  | -0.10760000 | -1.22000000 |
| C | 6.90280000  | 0.72650000  | 2.42590000  |
| C | 6.63190000  | 2.05590000  | 2.42580000  |
| C | 6.33650000  | 2.75170000  | 1.19710000  |
| C | 6.58580000  | 2.10140000  | -0.05470000 |
| C | 5.66660000  | 3.98210000  | 1.21970000  |
| C | 5.17800000  | 4.58340000  | 0.05410000  |
| C | 5.60820000  | 4.03580000  | -1.19770000 |
| C | 6.32020000  | 2.82910000  | -1.22030000 |
| C | 4.09640000  | 5.57090000  | 0.05420000  |
| C | 3.51180000  | 5.94960000  | -1.19760000 |
| C | 4.16110000  | 5.56180000  | -2.42620000 |
| H | 6.55330000  | 2.60460000  | 3.36120000  |
| C | 3.45300000  | 6.00220000  | 1.21980000  |
| C | 2.24540000  | 6.54880000  | -1.22020000 |
| H | 7.04540000  | 0.19100000  | 3.36150000  |
| H | 4.49750000  | -5.42380000 | 3.36120000  |

|   |             |             |             |
|---|-------------|-------------|-------------|
| H | 2.35450000  | -6.63870000 | 3.36130000  |
| H | -3.77500000 | -5.95970000 | 3.36160000  |
| H | -5.59400000 | -4.29850000 | 3.36170000  |
| H | -6.83050000 | 1.74370000  | 3.36130000  |
| H | -5.81090000 | 3.98630000  | 3.36140000  |
| H | -0.44810000 | 7.03070000  | 3.36140000  |
| H | 2.00020000  | 6.75960000  | 3.36140000  |
| C | 5.16290000  | 4.64690000  | -2.42630000 |
| H | 5.59400000  | 4.29850000  | -3.36170000 |
| H | 3.77500000  | 5.95970000  | -3.36160000 |
| H | -2.35450000 | 6.63870000  | -3.36130000 |
| H | -4.49750000 | 5.42380000  | -3.36120000 |
| H | -7.04540000 | -0.19100000 | -3.36150000 |
| H | -6.55330000 | -2.60460000 | -3.36120000 |
| H | -2.00020000 | -6.75960000 | -3.36140000 |
| H | 0.44810000  | -7.03070000 | -3.36140000 |
| H | -6.70460000 | 1.90290000  | -2.19250000 |
| H | -6.96450000 | -0.37380000 | 2.19240000  |
| H | -5.85020000 | 3.78900000  | -2.19240000 |
| H | -4.30380000 | 5.48010000  | 2.19270000  |
| H | -5.41800000 | -4.39700000 | -2.19200000 |
| H | -6.54870000 | -2.40300000 | 2.19270000  |
| H | -1.79990000 | -6.73770000 | 2.19240000  |
| H | -3.88890000 | -5.79270000 | -2.19220000 |
| H | 0.25810000  | -6.96330000 | 2.19260000  |
| H | 2.50230000  | -6.50140000 | -2.19260000 |
| H | 4.30380000  | -5.48010000 | -2.19270000 |
| H | 5.85020000  | -3.78900000 | 2.19240000  |
| H | 6.70460000  | -1.90290000 | 2.19250000  |
| H | 6.96450000  | 0.37380000  | -2.19240000 |
| H | 6.54870000  | 2.40300000  | -2.19270000 |
| H | 5.41800000  | 4.39700000  | 2.19200000  |
| H | 3.88890000  | 5.79270000  | 2.19220000  |
| H | 1.79990000  | 6.73770000  | -2.19240000 |
| H | 5.81090000  | -3.98630000 | -3.36140000 |
| H | 6.83050000  | -1.74370000 | -3.36130000 |
| H | -0.25810000 | 6.96330000  | -2.19260000 |
| H | -2.50230000 | 6.50140000  | 2.19260000  |

[12,12]CNB

|   |             |             |             |
|---|-------------|-------------|-------------|
| C | -7.50980000 | -3.55670000 | 2.43000000  |
| C | -7.77150000 | -2.84840000 | 1.20180000  |
| C | -7.51320000 | -3.49380000 | -0.05080000 |
| C | -6.78420000 | -4.76380000 | -0.05220000 |
| C | -6.35660000 | -5.31520000 | 1.19890000  |
| C | -6.83550000 | -4.73420000 | 2.42860000  |
| C | -5.38080000 | -6.32040000 | 1.21900000  |
| C | -4.76380000 | -6.78420000 | 0.05220000  |
| C | -5.31520000 | -6.35660000 | -1.19890000 |
| C | -6.32040000 | -5.38080000 | -1.21900000 |
| C | -3.49380000 | -7.51320000 | 0.05080000  |
| C | -2.84840000 | -7.77150000 | -1.20180000 |
| C | -3.55670000 | -7.50980000 | -2.43000000 |
| C | -4.73420000 | -6.83550000 | -2.42860000 |

|   |             |             |             |
|---|-------------|-------------|-------------|
| C | -2.78080000 | -7.81500000 | 1.21600000  |
| C | -1.42200000 | -8.15560000 | 1.19340000  |
| C | -0.73210000 | -8.24650000 | -0.05880000 |
| C | -1.49960000 | -8.14990000 | -1.22450000 |
| C | -0.67840000 | -8.28390000 | 2.42190000  |
| C | 0.67840000  | -8.28390000 | 2.42190000  |
| C | 1.42200000  | -8.15560000 | 1.19340000  |
| C | 0.73210000  | -8.24650000 | -0.05880000 |
| C | 2.78080000  | -7.81500000 | 1.21600000  |
| C | 3.49380000  | -7.51320000 | 0.05080000  |
| C | 2.84840000  | -7.77150000 | -1.20180000 |
| C | 1.49960000  | -8.14990000 | -1.22450000 |
| C | 4.76380000  | -6.78420000 | 0.05220000  |
| C | 5.31520000  | -6.35660000 | -1.19890000 |
| C | 4.73420000  | -6.83550000 | -2.42860000 |
| C | 3.55670000  | -7.50980000 | -2.43000000 |
| C | 5.38080000  | -6.32040000 | 1.21900000  |
| C | 6.35660000  | -5.31520000 | 1.19890000  |
| C | 6.78420000  | -4.76380000 | -0.05220000 |
| C | 6.32040000  | -5.38080000 | -1.21900000 |
| C | 6.83550000  | -4.73420000 | 2.42860000  |
| C | 7.50980000  | -3.55670000 | 2.43000000  |
| C | 7.77150000  | -2.84840000 | 1.20180000  |
| C | 7.51320000  | -3.49380000 | -0.05080000 |
| C | 8.14990000  | -1.49960000 | 1.22450000  |
| C | 8.24650000  | -0.73210000 | 0.05880000  |
| C | 8.15560000  | -1.42200000 | -1.19340000 |
| C | 7.81500000  | -2.78080000 | -1.21600000 |
| C | 8.24650000  | 0.73210000  | 0.05880000  |
| C | 8.15560000  | 1.42200000  | -1.19340000 |
| C | 8.28390000  | 0.67840000  | -2.42190000 |
| C | 8.28390000  | -0.67840000 | -2.42190000 |
| C | 8.14990000  | 1.49960000  | 1.22450000  |
| C | 7.77150000  | 2.84840000  | 1.20180000  |
| C | 7.51320000  | 3.49380000  | -0.05080000 |
| C | 7.81500000  | 2.78080000  | -1.21600000 |
| C | 7.50980000  | 3.55670000  | 2.43000000  |
| C | 6.83550000  | 4.73420000  | 2.42860000  |
| C | 6.35660000  | 5.31520000  | 1.19890000  |
| C | 6.78420000  | 4.76380000  | -0.05220000 |
| C | 5.38080000  | 6.32040000  | 1.21900000  |
| C | 4.76380000  | 6.78420000  | 0.05220000  |
| C | 5.31520000  | 6.35660000  | -1.19890000 |
| C | 6.32040000  | 5.38080000  | -1.21900000 |
| C | 3.49380000  | 7.51320000  | 0.05080000  |
| C | 2.84840000  | 7.77150000  | -1.20180000 |
| C | 3.55670000  | 7.50980000  | -2.43000000 |
| C | 4.73420000  | 6.83550000  | -2.42860000 |
| C | 2.78080000  | 7.81500000  | 1.21600000  |
| C | 1.42200000  | 8.15560000  | 1.19340000  |
| C | 0.73210000  | 8.24650000  | -0.05880000 |
| C | 1.49960000  | 8.14990000  | -1.22450000 |
| C | 0.67840000  | 8.28390000  | 2.42190000  |
| C | -0.67840000 | 8.28390000  | 2.42190000  |
| C | -1.42200000 | 8.15560000  | 1.19340000  |

|   |             |             |             |
|---|-------------|-------------|-------------|
| C | -0.73210000 | 8.24650000  | -0.05880000 |
| C | -2.78080000 | 7.81500000  | 1.21600000  |
| C | -3.49380000 | 7.51320000  | 0.05080000  |
| C | -2.84840000 | 7.77150000  | -1.20180000 |
| C | -1.49960000 | 8.14990000  | -1.22450000 |
| C | -4.76380000 | 6.78420000  | 0.05220000  |
| C | -5.31520000 | 6.35660000  | -1.19890000 |
| C | -4.73420000 | 6.83550000  | -2.42860000 |
| C | -3.55670000 | 7.50980000  | -2.43000000 |
| C | -5.38080000 | 6.32040000  | 1.21900000  |
| C | -6.35660000 | 5.31520000  | 1.19890000  |
| C | -6.78420000 | 4.76380000  | -0.05220000 |
| C | -6.32040000 | 5.38080000  | -1.21900000 |
| C | -6.83550000 | 4.73420000  | 2.42860000  |
| C | -7.50980000 | 3.55670000  | 2.43000000  |
| C | -7.77150000 | 2.84840000  | 1.20180000  |
| C | -7.51320000 | 3.49380000  | -0.05080000 |
| C | -8.14990000 | 1.49960000  | 1.22450000  |
| C | -8.24650000 | 0.73210000  | 0.05880000  |
| C | -8.15560000 | 1.42200000  | -1.19340000 |
| C | -7.81500000 | 2.78080000  | -1.21600000 |
| C | -8.24650000 | -0.73210000 | 0.05880000  |
| C | -8.15560000 | -1.42200000 | -1.19340000 |
| C | -8.28390000 | -0.67840000 | -2.42190000 |
| C | -8.28390000 | 0.67840000  | -2.42190000 |
| C | -8.14990000 | -1.49960000 | 1.22450000  |
| C | -7.81500000 | -2.78080000 | -1.21600000 |
| H | 6.58340000  | 5.22790000  | 3.36400000  |
| H | 7.80730000  | 3.09130000  | 3.36650000  |
| H | 7.80730000  | -3.09130000 | 3.36650000  |
| H | 6.58340000  | -5.22790000 | 3.36400000  |
| H | 1.23120000  | -8.31350000 | 3.35780000  |
| H | -1.23120000 | -8.31350000 | 3.35780000  |
| H | -6.58340000 | -5.22790000 | 3.36400000  |
| H | -7.80730000 | -3.09130000 | 3.36650000  |
| H | -7.80730000 | 3.09130000  | 3.36650000  |
| H | -6.58340000 | 5.22790000  | 3.36400000  |
| H | -1.23120000 | 8.31350000  | 3.35780000  |
| H | 1.23120000  | 8.31350000  | 3.35780000  |
| H | -5.22790000 | -6.58340000 | -3.36400000 |
| H | -3.09130000 | -7.80730000 | -3.36650000 |
| H | 3.09130000  | -7.80730000 | -3.36650000 |
| H | 5.22790000  | -6.58340000 | -3.36400000 |
| H | 8.31350000  | -1.23120000 | -3.35780000 |
| H | 8.31350000  | 1.23120000  | -3.35780000 |
| H | 5.22790000  | 6.58340000  | -3.36400000 |
| H | 3.09130000  | 7.80730000  | -3.36650000 |
| H | -3.09130000 | 7.80730000  | -3.36650000 |
| H | -5.22790000 | 6.58340000  | -3.36400000 |
| H | -8.31350000 | 1.23120000  | -3.35780000 |
| H | -8.31350000 | -1.23120000 | -3.35780000 |
| H | -7.68340000 | 3.24540000  | -2.18860000 |
| H | -8.26240000 | 1.02970000  | 2.19700000  |
| H | -6.65690000 | 5.03170000  | -2.19060000 |
| H | -5.03170000 | 6.65690000  | 2.19060000  |

|   |             |             |             |
|---|-------------|-------------|-------------|
| H | -8.26240000 | -1.02970000 | 2.19700000  |
| H | -7.68340000 | -3.24540000 | -2.18860000 |
| H | -5.03170000 | -6.65690000 | 2.19060000  |
| H | -6.65690000 | -5.03170000 | -2.19060000 |
| H | -3.24540000 | -7.68340000 | 2.18860000  |
| H | -1.02970000 | -8.26240000 | -2.19700000 |
| H | 1.02970000  | -8.26240000 | -2.19700000 |
| H | 3.24540000  | -7.68340000 | 2.18860000  |
| H | 5.03170000  | -6.65690000 | 2.19060000  |
| H | 6.65690000  | -5.03170000 | -2.19060000 |
| H | 7.68340000  | -3.24540000 | -2.18860000 |
| H | 8.26240000  | -1.02970000 | 2.19700000  |
| H | 8.26240000  | 1.02970000  | 2.19700000  |
| H | 7.68340000  | 3.24540000  | -2.18860000 |
| H | 6.65690000  | 5.03170000  | -2.19060000 |
| H | 5.03170000  | 6.65690000  | 2.19060000  |
| H | 3.24540000  | 7.68340000  | 2.18860000  |
| H | 1.02970000  | 8.26240000  | -2.19700000 |
| H | -3.24540000 | 7.68340000  | 2.18860000  |
| H | -1.02970000 | 8.26240000  | -2.19700000 |

[14,14]CNB

|   |             |             |             |
|---|-------------|-------------|-------------|
| C | -8.98714800 | -3.58704400 | 2.43251600  |
| C | -9.40098000 | -2.29244100 | 2.43249300  |
| C | -9.52639300 | -1.55032000 | 1.20241900  |
| C | -9.39356900 | -2.23560800 | -0.04977500 |
| C | -8.94816500 | -3.62913300 | -0.04975900 |
| C | -8.65885000 | -4.26436100 | 1.20246400  |
| C | -7.96015500 | -5.48010400 | 1.21986500  |
| C | -7.49360400 | -6.09009700 | 0.04962800  |
| C | -7.91059900 | -5.53036000 | -1.20259200 |
| C | -8.63876900 | -4.33203400 | -1.22000100 |
| C | -6.48758300 | -7.15226100 | 0.04969300  |
| C | -5.95122300 | -7.59909100 | -1.20247000 |
| C | -6.54093900 | -7.13144800 | -2.43256200 |
| C | -7.47554500 | -6.14464300 | -2.43262000 |
| C | -5.90376500 | -7.65104000 | 1.21999000  |
| C | -4.72768400 | -8.41461700 | 1.20269600  |
| C | -4.10914500 | -8.73823200 | -0.04948400 |
| C | -4.79419700 | -8.39125100 | -1.21976500 |
| C | -4.06906900 | -8.77885200 | 2.43278700  |
| C | -2.79877300 | -9.26218200 | 2.43279200  |
| C | -2.06462800 | -9.42794300 | 1.20270800  |
| C | -2.74182500 | -9.25852800 | -0.04947700 |
| C | -0.67845100 | -9.63943600 | 1.21999900  |
| C | 0.08924600  | -9.65511100 | 0.04969700  |
| C | -0.60847600 | -9.63231300 | -1.20246300 |
| C | -1.99942000 | -9.45480200 | -1.21975200 |
| C | 1.54693400  | -9.53083500 | 0.04963000  |
| C | 2.23058600  | -9.39016400 | -1.20259200 |
| C | 1.49716200  | -9.55959600 | -2.43261300 |
| C | 0.14293800  | -9.67512800 | -2.43255200 |
| C | 2.30103600  | -9.38561500 | 1.21986100  |
| C | 3.63138900  | -8.94248500 | 1.20246200  |

|   |             |             |             |
|---|-------------|-------------|-------------|
| C | 4.26993700  | -8.66057800 | -0.04976200 |
| C | 3.57136700  | -8.97966700 | -1.22000000 |
| C | 4.32703600  | -8.65506900 | 2.43251500  |
| C | 5.49711700  | -7.96357400 | 2.43249000  |
| C | 6.08433500  | -7.49277200 | 1.20241700  |
| C | 5.52939700  | -7.91622300 | -0.04978200 |
| C | 7.11417000  | -6.54111500 | 1.21979000  |
| C | 7.60499800  | -5.95047100 | 0.04955600  |
| C | 7.15195200  | -6.48147900 | -1.20264900 |
| C | 6.14574300  | -7.45808100 | -1.22002700 |
| C | 8.41672100  | -4.73334200 | 0.04960400  |
| C | 8.73287000  | -4.11094400 | -1.20256700 |
| C | 8.40804600  | -4.78986900 | -2.43265900 |
| C | 7.65394500  | -5.92062200 | -2.43269700 |
| C | 8.77327900  | -4.05325200 | 1.21989400  |
| C | 9.25593100  | -2.73671900 | 1.20260200  |
| C | 9.43353800  | -2.06159600 | -0.04956900 |
| C | 9.24763900  | -2.80663600 | -1.21985900 |
| C | 9.46469200  | -2.01361500 | 2.43268700  |
| C | 9.65318000  | -0.66760000 | 2.43272600  |
| C | 9.65117800  | 0.08508700  | 1.20268000  |
| C | 9.63649900  | -0.61276800 | -0.04952400 |
| C | 9.54910400  | 1.48358600  | 1.22003500  |
| C | 9.39357000  | 2.23560900  | 0.04977800  |
| C | 9.52639300  | 1.55031900  | -1.20241700 |
| C | 9.66264000  | 0.15473700  | -1.21976900 |
| C | 8.94816600  | 3.62913500  | 0.04976100  |
| C | 8.65885000  | 4.26436300  | -1.20246400 |
| C | 8.98715100  | 3.58704400  | -2.43251600 |
| C | 9.40098300  | 2.29244200  | -2.43249100 |
| C | 8.63877100  | 4.33203600  | 1.22000100  |
| C | 7.91059900  | 5.53036200  | 1.20259200  |
| C | 7.49360400  | 6.09009800  | -0.04962800 |
| C | 7.96015500  | 5.48010400  | -1.21986600 |
| C | 7.47554600  | 6.14464500  | 2.43262000  |
| C | 6.54094000  | 7.13145200  | 2.43256000  |
| C | 5.95122700  | 7.59909400  | 1.20246800  |
| C | 6.48758400  | 7.15226000  | -0.04969300 |
| C | 4.79420000  | 8.39125600  | 1.21976400  |
| C | 4.10914800  | 8.73823500  | 0.04948400  |
| C | 4.72768500  | 8.41461600  | -1.20269600 |
| C | 5.90376400  | 7.65103900  | -1.21999200 |
| C | 2.74182500  | 9.25853000  | 0.04947600  |
| C | 2.06462700  | 9.42794000  | -1.20271000 |
| C | 2.79877400  | 9.26218000  | -2.43279600 |
| C | 4.06907000  | 8.77885100  | -2.43278900 |
| C | 1.99942200  | 9.45480500  | 1.21975000  |
| C | 0.60847600  | 9.63231300  | 1.20246300  |
| C | -0.08924600 | 9.65510700  | -0.04969700 |
| C | 0.67845300  | 9.63943000  | -1.22000100 |
| C | -0.14293600 | 9.67512700  | 2.43255000  |
| C | -1.49716200 | 9.55959400  | 2.43261000  |
| C | -2.23058400 | 9.39016300  | 1.20259100  |
| C | -1.54693100 | 9.53083200  | -0.04963100 |
| C | -3.57136800 | 8.97966700  | 1.21999800  |



|   |             |             |             |
|---|-------------|-------------|-------------|
| C | -4.26993700 | 8.66057800  | 0.04976300  |
| C | -3.63138700 | 8.94248300  | -1.20246200 |
| C | -2.30103500 | 9.38561100  | -1.21986300 |
| C | -5.52939900 | 7.91622200  | 0.04978200  |
| C | -6.08433500 | 7.49276800  | -1.20241800 |
| C | -5.49711600 | 7.96357200  | -2.43249200 |
| C | -4.32703600 | 8.65506700  | -2.43251600 |
| C | -6.14574400 | 7.45808400  | 1.22002600  |
| C | -7.15195400 | 6.48148000  | 1.20265000  |
| C | -7.60499800 | 5.95047000  | -0.04955400 |
| C | -7.11416800 | 6.54111200  | -1.21979000 |
| C | -7.65394700 | 5.92062400  | 2.43269700  |
| C | -8.40804700 | 4.78986900  | 2.43265900  |
| C | -8.73287200 | 4.11094500  | 1.20256900  |
| C | -8.41672100 | 4.73334300  | -0.04960300 |
| C | -9.24764200 | 2.80663700  | 1.21986100  |
| C | -9.43354100 | 2.06159700  | 0.04957100  |
| C | -9.25593400 | 2.73671900  | -1.20259900 |
| C | -8.77328200 | 4.05325200  | -1.21989200 |
| C | -9.63650100 | 0.61276800  | 0.04952700  |
| C | -9.65118100 | -0.08508700 | -1.20267900 |
| C | -9.65318500 | 0.66760200  | -2.43272400 |
| C | -9.46469700 | 2.01361600  | -2.43268600 |
| C | -9.66264100 | -0.15473600 | 1.21977100  |
| C | -9.54910500 | -1.48358400 | -1.22003400 |
| H | 5.98632300  | -7.69994900 | 3.37358300  |
| H | 3.86016700  | -8.95642400 | 3.37362600  |
| H | -2.28751900 | -9.47990500 | 3.37390200  |
| H | -4.59575500 | -8.60166500 | 3.37389300  |
| H | -8.83894100 | -4.12259700 | 3.37362600  |
| H | -9.59095600 | -1.77020900 | 3.37358600  |
| H | -8.73435400 | 4.34003600  | 3.37374600  |
| H | -7.36413100 | 6.39473300  | 3.37381500  |
| H | -2.05224100 | 9.53430200  | 3.37373700  |
| H | 0.40848700  | 9.74426900  | 3.37362500  |
| H | 6.17509300  | 7.54979400  | 3.37363200  |
| H | 7.87332200  | 5.75665700  | 3.37374200  |
| H | 9.75188600  | -0.12077100 | 3.37384600  |
| H | 9.40932100  | -2.56656600 | 3.37377900  |
| H | 7.46459600  | -6.19745300 | 2.19401600  |
| H | 8.59062300  | -4.50889000 | 2.19408500  |
| H | -0.19115200 | -9.69871800 | 2.19418900  |
| H | 1.83092200  | -9.52667100 | 2.19409000  |
| H | -7.70296200 | -5.89812900 | 2.19410200  |
| H | -6.30723200 | -7.37141000 | 2.19418200  |
| H | -9.41408600 | 2.34484400  | 2.19405700  |
| H | -9.69581700 | 0.33498300  | 2.19398600  |
| H | -4.03616100 | 8.82213200  | 2.19424500  |
| H | -5.78351700 | 7.78925400  | 2.19425300  |
| H | 4.38111500  | 8.65641900  | 2.19396600  |
| H | 2.48429100  | 9.37821700  | 2.19394600  |
| H | 9.49871100  | 1.97182000  | 2.19425100  |
| H | 8.88106400  | 3.90524100  | 2.19424600  |
| H | 9.41408300  | -2.34484200 | -2.19405500 |
| H | 8.73435600  | -4.34003300 | -3.37374500 |

|   |             |             |             |
|---|-------------|-------------|-------------|
| H | 5.78351600  | -7.78925100 | -2.19425400 |
| H | 7.36412800  | -6.39473500 | -3.37381300 |
| H | 4.03616300  | -8.82213000 | -2.19424400 |
| H | 2.05224500  | -9.53430600 | -3.37373700 |
| H | -2.48428800 | -9.37821400 | -2.19394800 |
| H | -0.40849000 | -9.74427300 | -3.37362400 |
| H | -4.38110900 | -8.65641400 | -2.19396600 |
| H | -6.17509200 | -7.54979000 | -3.37363400 |
| H | -8.88106300 | -3.90524000 | -2.19424600 |
| H | -7.87332300 | -5.75665500 | -3.37374200 |
| H | -9.49871200 | -1.97182100 | -2.19424800 |
| H | -9.75189300 | 0.12077200  | -3.37384400 |
| H | -8.59062700 | 4.50888800  | -2.19408400 |
| H | -9.40932900 | 2.56656800  | -3.37377600 |
| H | -7.46459600 | 6.19744600  | -2.19401500 |
| H | -5.98632300 | 7.69994800  | -3.37358400 |
| H | -1.83092200 | 9.52666700  | -2.19409200 |
| H | -3.86016600 | 8.95642300  | -3.37362700 |
| H | 0.19114900  | 9.69871100  | -2.19418900 |
| H | 2.28751700  | 9.47990500  | -3.37390400 |
| H | 6.30723000  | 7.37140700  | -2.19418400 |
| H | 4.59576000  | 8.60166400  | -3.37389200 |
| H | 7.70296200  | 5.89813100  | -2.19410100 |
| H | 8.83894600  | 4.12259800  | -3.37362600 |
| H | 9.69581700  | -0.33498200 | -2.19398400 |
| H | 9.59096200  | 1.77020900  | -3.37358400 |

[16,16]CNB

|   |             |             |             |
|---|-------------|-------------|-------------|
| C | 0.42874100  | 11.02447000 | 0.04935600  |
| C | 1.19447700  | 10.97502200 | 1.21972900  |
| C | 2.57404800  | 10.72407600 | 1.20278300  |
| C | 3.24813900  | 10.54288400 | -0.04945000 |
| C | 2.50935400  | 10.75021200 | -1.21984200 |
| C | 1.12471800  | 10.97146300 | -1.20288800 |
| C | -1.03358300 | 10.98443200 | 0.04940200  |
| C | -1.72571500 | 10.89350500 | -1.20280500 |
| C | -0.98243400 | 11.00718300 | -2.43295800 |
| C | 0.37627200  | 11.04434700 | -2.43299500 |
| C | -1.79538000 | 10.89300000 | 1.21982800  |
| C | -3.15912600 | 10.56683000 | 1.20295300  |
| C | -3.82235100 | 10.34913700 | -0.04925600 |
| C | -3.09617000 | 10.59677400 | -1.21967600 |
| C | -3.87835700 | 10.34738800 | 2.43307300  |
| C | -5.11921700 | 9.79264800  | 2.43306200  |
| C | -5.76233200 | 9.40299900  | 1.20293200  |
| C | -5.15779900 | 9.75202300  | -0.04927300 |
| C | -6.91483100 | 8.60429300  | 1.21981100  |
| C | -7.49100700 | 8.09764500  | 0.04938600  |
| C | -6.96161000 | 8.55264700  | -1.20282700 |
| C | -5.82651400 | 9.37589000  | -1.21971100 |
| C | -8.49648700 | 7.03509900  | 0.04934800  |
| C | -8.92158800 | 6.48147600  | -1.20288500 |
| C | -8.47643700 | 7.08754600  | -2.43299500 |
| C | -7.54216800 | 8.07475800  | -2.43296700 |

|   |             |              |             |
|---|-------------|--------------|-------------|
| C | -8.97060100 | 6.43179400   | 1.21973400  |
| C | -9.70475900 | 5.23713900   | 1.20278800  |
| C | 10.01998500 | 4.61435700   | -0.04944500 |
| C | -9.68114200 | 5.30280400   | -1.21983400 |
| C | 10.05865700 | 4.57366200   | 2.43290200  |
| C | 10.54456900 | 3.30427100   | 2.43290300  |
| C | 10.72408200 | 2.57404700   | 1.20278700  |
| C | 10.54289100 | 3.24814000   | -0.04944600 |
| C | 10.97502800 | 1.19447700   | 1.21973200  |
| C | 11.02447500 | 0.42874200   | 0.04935900  |
| C | 10.97146800 | 1.12471900   | -1.20288500 |
| C | 10.75021800 | 2.50935600   | -1.21983800 |
| C | 10.98443600 | -1.03358100  | 0.04940300  |
| C | 10.89350900 | -1.72571200  | -1.20280200 |
| C | 11.00718500 | -0.98243300  | -2.43295400 |
| C | 11.04434900 | 0.37627300   | -2.43299200 |
| C | 10.89300200 | -1.79538000  | 1.21983000  |
| C | 10.56683200 | -3.15912400  | 1.20295400  |
| C | 10.34914000 | -3.82235100  | -0.04925700 |
| C | 10.59677700 | -3.09617000  | -1.21967500 |
| C | 10.34738900 | -3.87835700  | 2.43307300  |
| C | -9.79264800 | -5.11921700  | 2.43306200  |
| C | -9.40299900 | -5.76233200  | 1.20293100  |
| C | -9.75202500 | -5.15780000  | -0.04927300 |
| C | -8.60429200 | -6.91483000  | 1.21980700  |
| C | -8.09764600 | -7.49100500  | 0.04938000  |
| C | -8.55264900 | -6.96160700  | -1.20283200 |
| C | -9.37589400 | -5.82651100  | -1.21971300 |
| C | -7.03510000 | -8.49648400  | 0.04934000  |
| C | -6.48147700 | -8.92158300  | -1.20289400 |
| C | -7.08754900 | -8.47643100  | -2.43300300 |
| C | -8.07476100 | -7.54216200  | -2.43297300 |
| C | -6.43179400 | -8.97060100  | 1.21972400  |
| C | -5.23713900 | -9.70475800  | 1.20277700  |
| C | -4.61435700 | -10.01998200 | -0.04945700 |
| C | -5.30280600 | -9.68113700  | -1.21984500 |
| C | -4.57366000 | -10.05865700 | 2.43289000  |
| C | -3.30427000 | -10.54456900 | 2.43288900  |
| C | -2.57404700 | -10.72408000 | 1.20277200  |
| C | -3.24814000 | -10.54288700 | -0.04946000 |
| C | -1.19447700 | -10.97502600 | 1.21971500  |
| C | -0.42874200 | -11.02447100 | 0.04934100  |
| C | -1.12472100 | -10.97146200 | -1.20290100 |
| C | -2.50935700 | -10.75021300 | -1.21985300 |
| C | 1.03358200  | -10.98443200 | 0.04938600  |
| C | 1.72571200  | -10.89350200 | -1.20282200 |
| C | 0.98243000  | -11.00717800 | -2.43297400 |
| C | -0.37627600 | -11.04434300 | -2.43301000 |
| C | 1.79538100  | -10.89300200 | 1.21981000  |
| C | 3.15912600  | -10.56683100 | 1.20293500  |
| C | 3.82235000  | -10.34913500 | -0.04927400 |
| C | 3.09616700  | -10.59676900 | -1.21969400 |
| C | 3.87835800  | -10.34739300 | 2.43305500  |
| C | 5.11921800  | -9.79265200  | 2.43304400  |
| C | 5.76233100  | -9.40300000  | 1.20291400  |

|   |             |             |             |
|---|-------------|-------------|-------------|
| C | 5.15779700  | -9.75202100 | -0.04929100 |
| C | 6.91482900  | -8.60429200 | 1.21979400  |
| C | 7.49100500  | -8.09764100 | 0.04937000  |
| C | 6.96160700  | -8.55264100 | -1.20284400 |
| C | 5.82651000  | -9.37588500 | -1.21972900 |
| C | 8.49648400  | -7.03509600 | 0.04933300  |
| C | 8.92158600  | -6.48147200 | -1.20289900 |
| C | 8.47643600  | -7.08754000 | -2.43301000 |
| C | 7.54216500  | -8.07475100 | -2.43298300 |
| C | 8.97059600  | -6.43178900 | 1.21972000  |
| C | 9.70475500  | -5.23713600 | 1.20277500  |
| C | 10.01998500 | -4.61435600 | -0.04945600 |
| C | 9.68114300  | -5.30280200 | -1.21984600 |
| C | 10.05864600 | -4.57365900 | 2.43289400  |
| C | 10.54455800 | -3.30427100 | 2.43289700  |
| C | 10.72407800 | -2.57404700 | 1.20277600  |
| C | 10.54289300 | -3.24813800 | -0.04945600 |
| C | 10.97502400 | -1.19447800 | 1.21972500  |
| C | 11.02447900 | -0.42874100 | 0.04935200  |
| C | 10.97147800 | -1.12471800 | -1.20289200 |
| C | 10.75022700 | -2.50935500 | -1.21984700 |
| C | 10.98444000 | 1.03358200  | 0.04939800  |
| C | 10.89351600 | 1.72571400  | -1.20281000 |
| C | 11.00719900 | 0.98243300  | -2.43296200 |
| C | 11.04436600 | -0.37627200 | -2.43299900 |
| C | 10.89300700 | 1.79538000  | 1.21982300  |
| C | 10.56683600 | 3.15912500  | 1.20294800  |
| C | 10.34914400 | 3.82235000  | -0.04926200 |
| C | 10.59678400 | 3.09616900  | -1.21968200 |
| C | 10.34739400 | 3.87835700  | 2.43306700  |
| C | 9.79265400  | 5.11921700  | 2.43305600  |
| C | 9.40300400  | 5.76233000  | 1.20292600  |
| C | 9.75202700  | 5.15779700  | -0.04927900 |
| C | 8.60429600  | 6.91482800  | 1.21980400  |
| C | 8.09764600  | 7.49100200  | 0.04937900  |
| C | 8.55264600  | 6.96160400  | -1.20283400 |
| C | 9.37589100  | 5.82650900  | -1.21971800 |
| C | 7.03509900  | 8.49648100  | 0.04934100  |
| C | 6.48147300  | 8.92158000  | -1.20289200 |
| C | 7.08754200  | 8.47642800  | -2.43300200 |
| C | 8.07475400  | 7.54215900  | -2.43297400 |
| C | 6.43179400  | 8.97059600  | 1.21972700  |
| C | 5.23713900  | 9.70475300  | 1.20278200  |
| C | 4.61435500  | 10.01997800 | -0.04945000 |
| C | 5.30280200  | 9.68113400  | -1.21984000 |
| C | 4.57366200  | 10.05865000 | 2.43289700  |
| C | 3.30427200  | 10.54456100 | 2.43289800  |
| H | 10.66007600 | -2.99194800 | -2.19394700 |
| H | 11.07855400 | -0.93052300 | -3.37430800 |
| H | 11.01100200 | 1.53777300  | -3.37424000 |
| H | 9.65356200  | 5.42152700  | -2.19378100 |
| H | 10.48020800 | 3.57318300  | -2.19373300 |
| H | 8.49101100  | 7.17454100  | -3.37425500 |
| H | 6.69763600  | 8.87183600  | -3.37430300 |
| H | 2.99194600  | 10.66005600 | -2.19394200 |

|   |             |              |             |
|---|-------------|--------------|-------------|
| H | 4.88334500  | 9.93627900   | -2.19393100 |
| H | 0.93052300  | 11.07853000  | -3.37430400 |
| H | -1.53777400 | 11.01098300  | -3.37423600 |
| H | -5.42153300 | 9.65356300   | -2.19377400 |
| H | -3.57318300 | 10.48019600  | -2.19372800 |
| H | -7.17455000 | 8.49101500   | -3.37424700 |
| H | -8.87184700 | 6.69764200   | -3.37429600 |
| H | 10.66006100 | 2.99194900   | -2.19393800 |
| H | -9.93628800 | 4.88334900   | -2.19392500 |
| H | 11.07853100 | 0.93052300   | -3.37430200 |
| H | 11.01098400 | -1.53777000  | -3.37423400 |
| H | -9.65357000 | -5.42152700  | -2.19377300 |
| H | 10.48019800 | -3.57317500  | -2.19373100 |
| H | -8.49102000 | -7.17454400  | -3.37425200 |
| H | -6.69764500 | -8.87183900  | -3.37430500 |
| H | -2.99195100 | -10.66005500 | -2.19395200 |
| H | -4.88335100 | -9.93628100  | -2.19393700 |
| H | -0.93052800 | -11.07852500 | -3.37431800 |
| H | 1.53776800  | -11.01097600 | -3.37425300 |
| H | 5.42153000  | -9.65355600  | -2.19379200 |
| H | 3.57317900  | -10.48018800 | -2.19374600 |
| H | 7.17454600  | -8.49100600  | -3.37426400 |
| H | 8.87184600  | -6.69763500  | -3.37431000 |
| H | 9.93629000  | -4.88334500  | -2.19393600 |
| H | 11.05033900 | -0.70933300  | 2.19381700  |
| H | 10.99457700 | 1.31501400   | 2.19389500  |
| H | 8.31416600  | 7.31093300   | 2.19387900  |
| H | 6.84328300  | 8.70277800   | 2.19381600  |
| H | 0.70933500  | 11.05034200  | 2.19382100  |
| H | -1.31501400 | 10.99457000  | 2.19389900  |
| H | -7.31093600 | 8.31416300   | 2.19388600  |
| H | -8.70278300 | 6.84328200   | 2.19382300  |
| H | 11.05034900 | 0.70933400   | 2.19382400  |
| H | 10.99457200 | -1.31501400  | 2.19390200  |
| H | -8.31416000 | -7.31093600  | 2.19388100  |
| H | -6.84328100 | -8.70278400  | 2.19381500  |
| H | -0.70933300 | -11.05034800 | 2.19380700  |
| H | 1.31501500  | -10.99457500 | 2.19388200  |
| H | 7.31093600  | -8.31416600  | 2.19387000  |
| H | 8.70277300  | -6.84327700  | 2.19380800  |
| H | 10.76092800 | -2.79282000  | 3.37418600  |
| H | 10.59119800 | 3.37943300   | 3.37437300  |
| H | 9.58343900  | 5.63362200   | 3.37435200  |
| H | 5.09887300  | 9.87824500   | 3.37418900  |
| H | 2.79283300  | 10.76093000  | 3.37419500  |
| H | -3.37943200 | 10.59119100  | 3.37437900  |
| H | -5.63362100 | 9.58343200   | 3.37435900  |
| H | -9.87825200 | 5.09887200   | 3.37419500  |
| H | 10.76093800 | 2.79283200   | 3.37419900  |
| H | 10.59119100 | -3.37943300  | 3.37437900  |
| H | -9.58343200 | -5.63362000  | 3.37435800  |
| H | -5.09887000 | -9.87825500  | 3.37418300  |
| H | -2.79283000 | -10.76093900 | 3.37418400  |
| H | 3.37943500  | -10.59119800 | 3.37436000  |
| H | 5.63362300  | -9.58343900  | 3.37434000  |

|   |            |             |            |
|---|------------|-------------|------------|
| H | 9.87823700 | -5.09887600 | 3.37418200 |
|---|------------|-------------|------------|
